# Supplementary material
Source: PubMed Central journal article supplement (PMC4551262)
Supplement: AEM.01049-15_zam999116537so1.pdf [file AEM.01049-15_zam999116537so1.pdf]

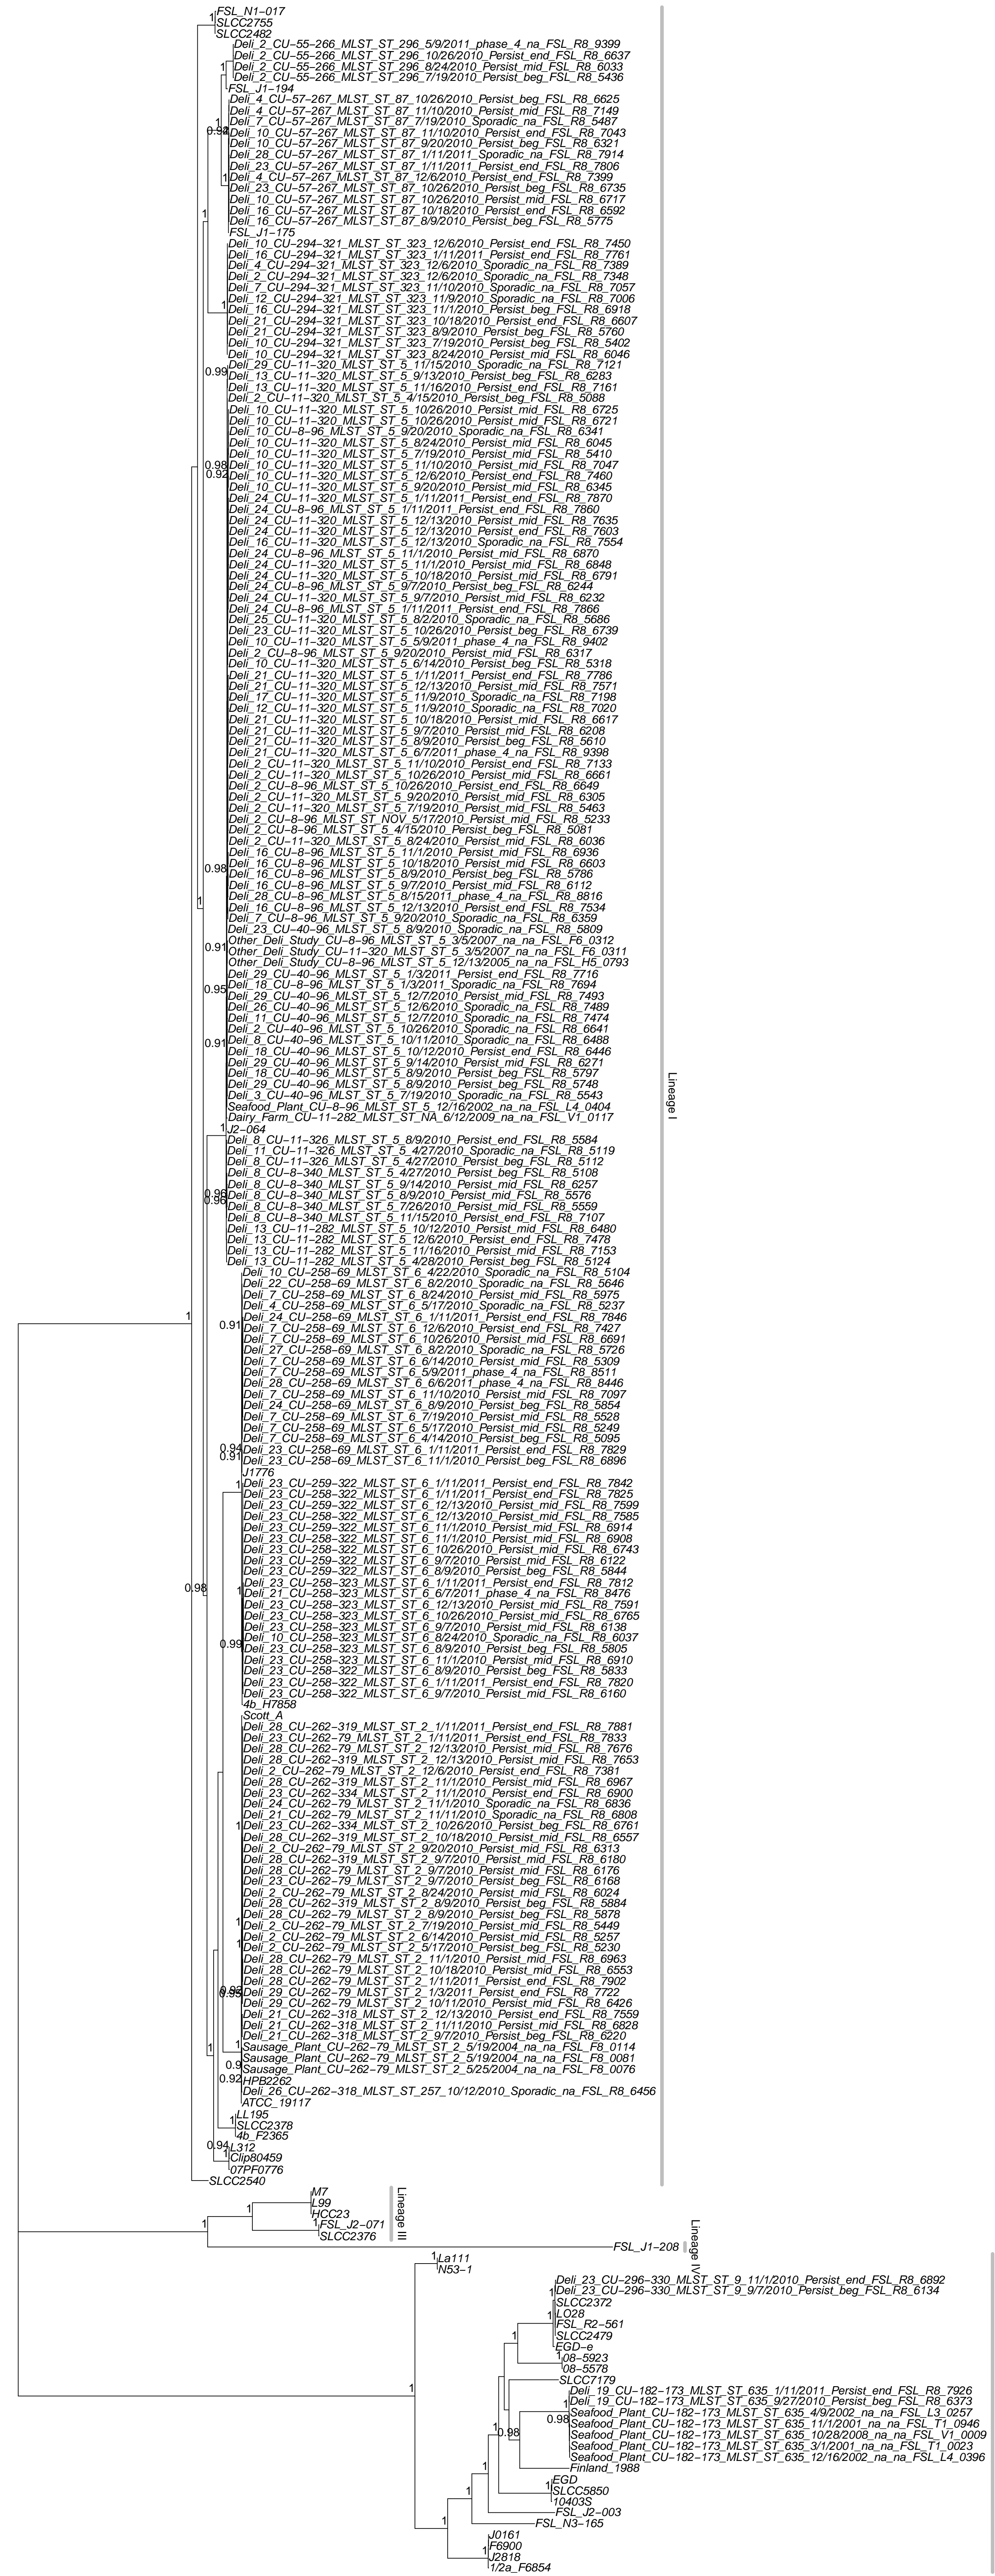

FIG S1. Maximum likelihood phylogenetic tree generated from 16,097 core genome SNPs differentiating all 188 isolates sequenced in this study (long taxa starting with 'Deli'), plus a set of 44 additional *L. monocytogenes* genomes that span the genetic diversity of the isolates (all other taxa, Table S2). Bootstrap support values are plotted for nodes with > 90% support. Genetic lineages are annotated.

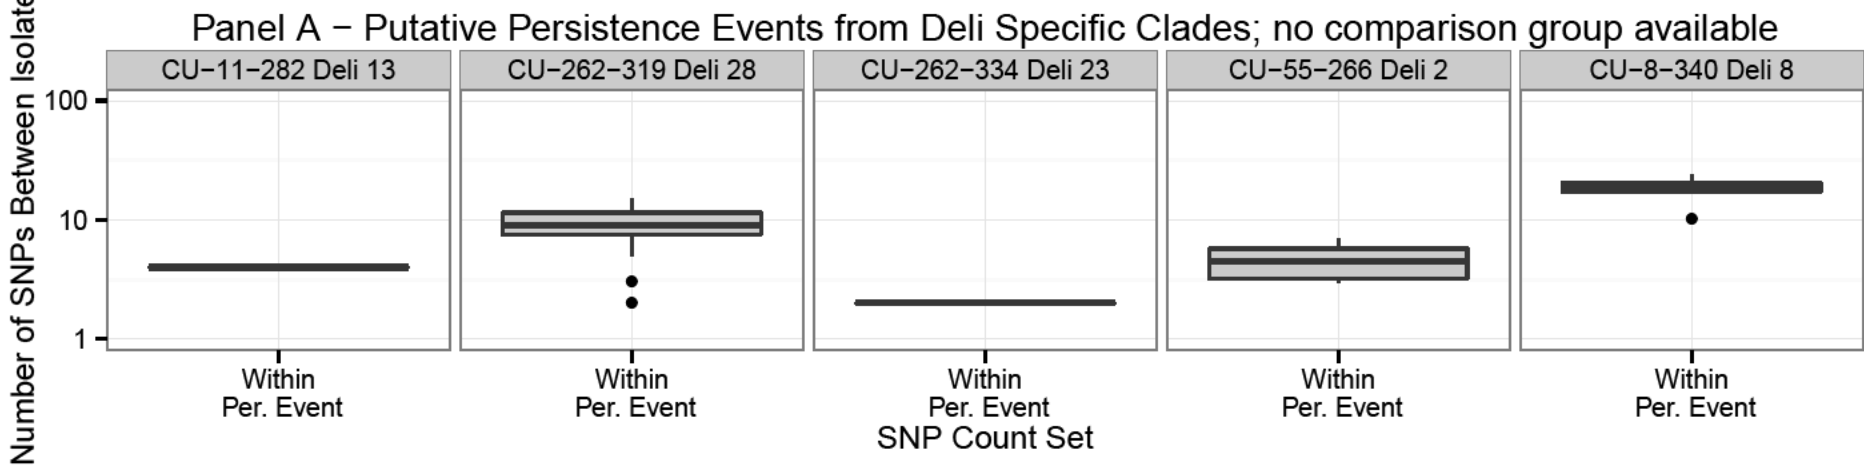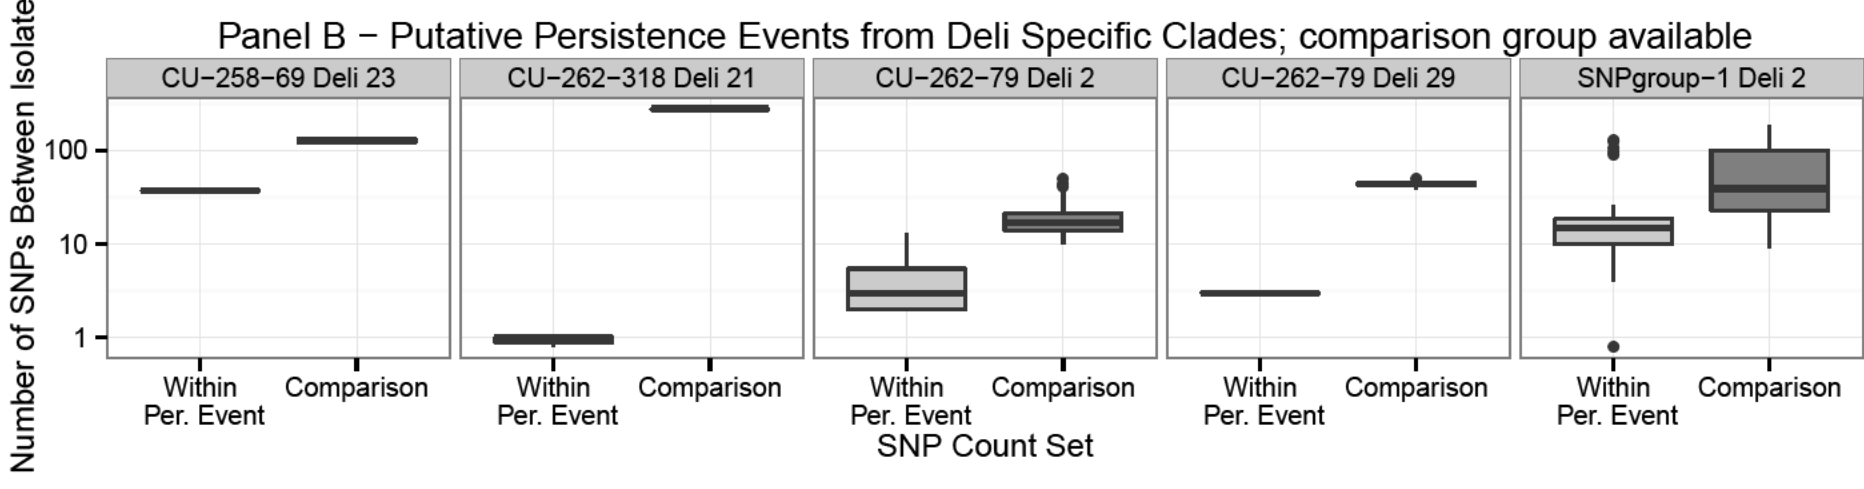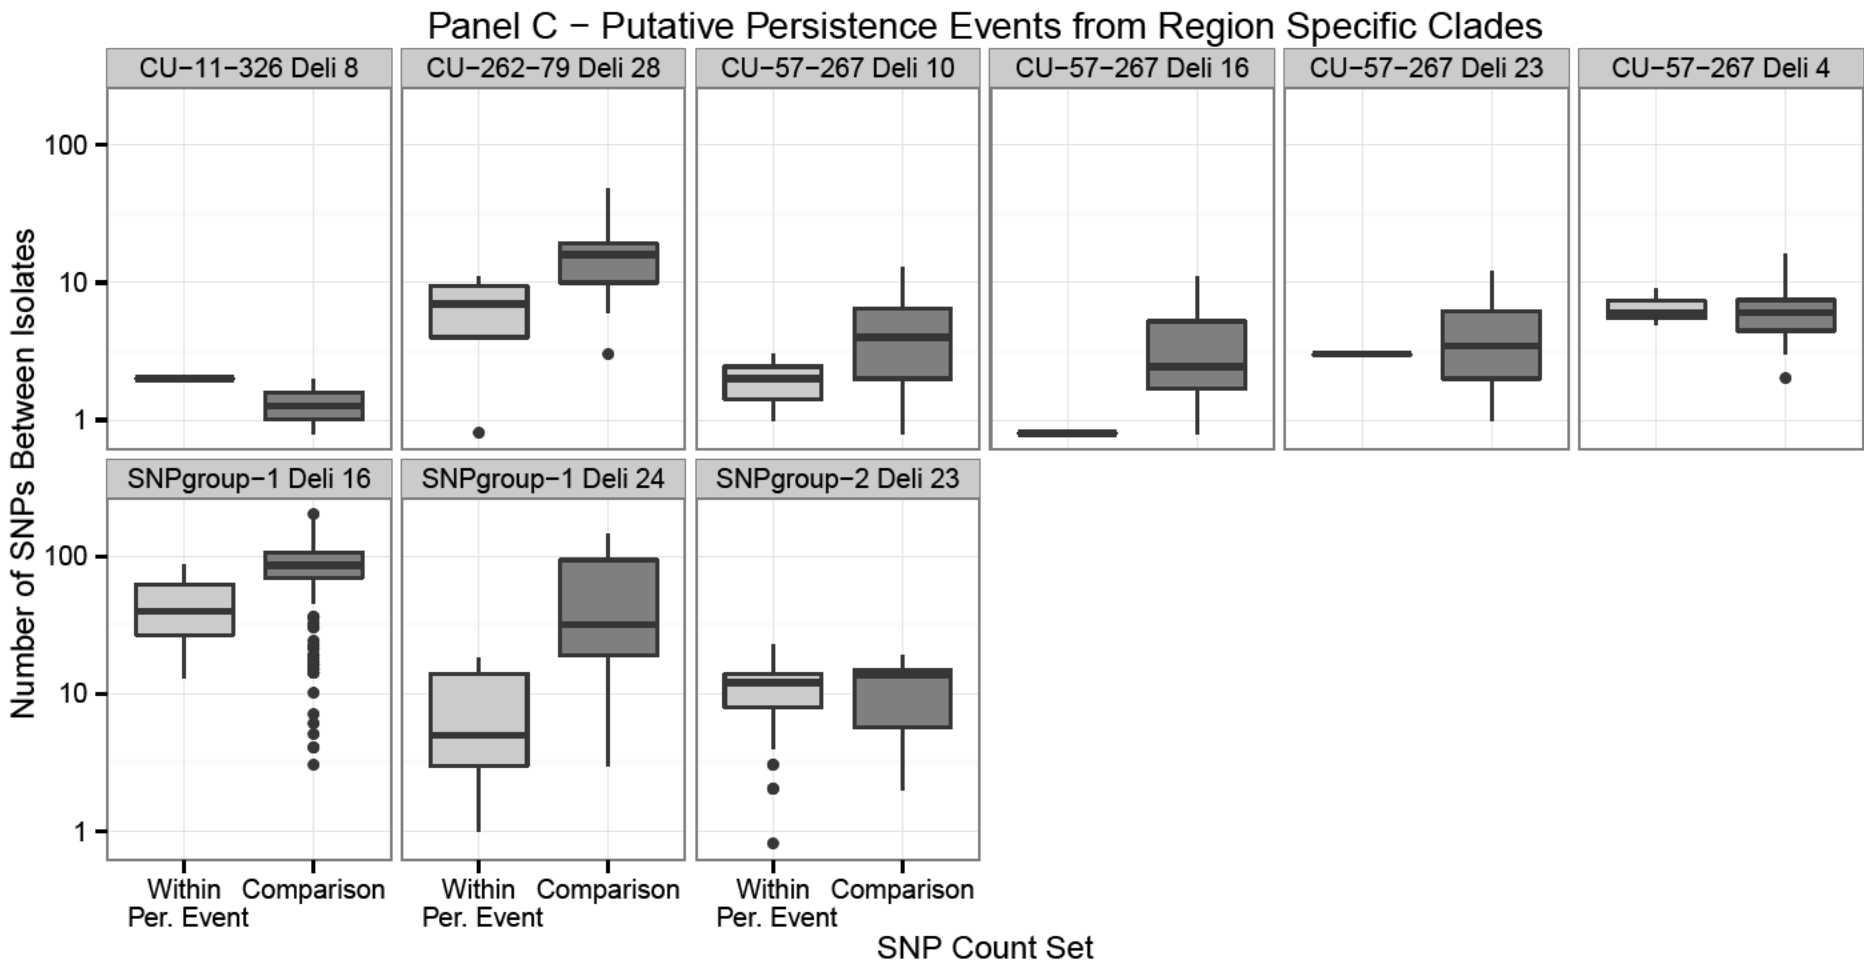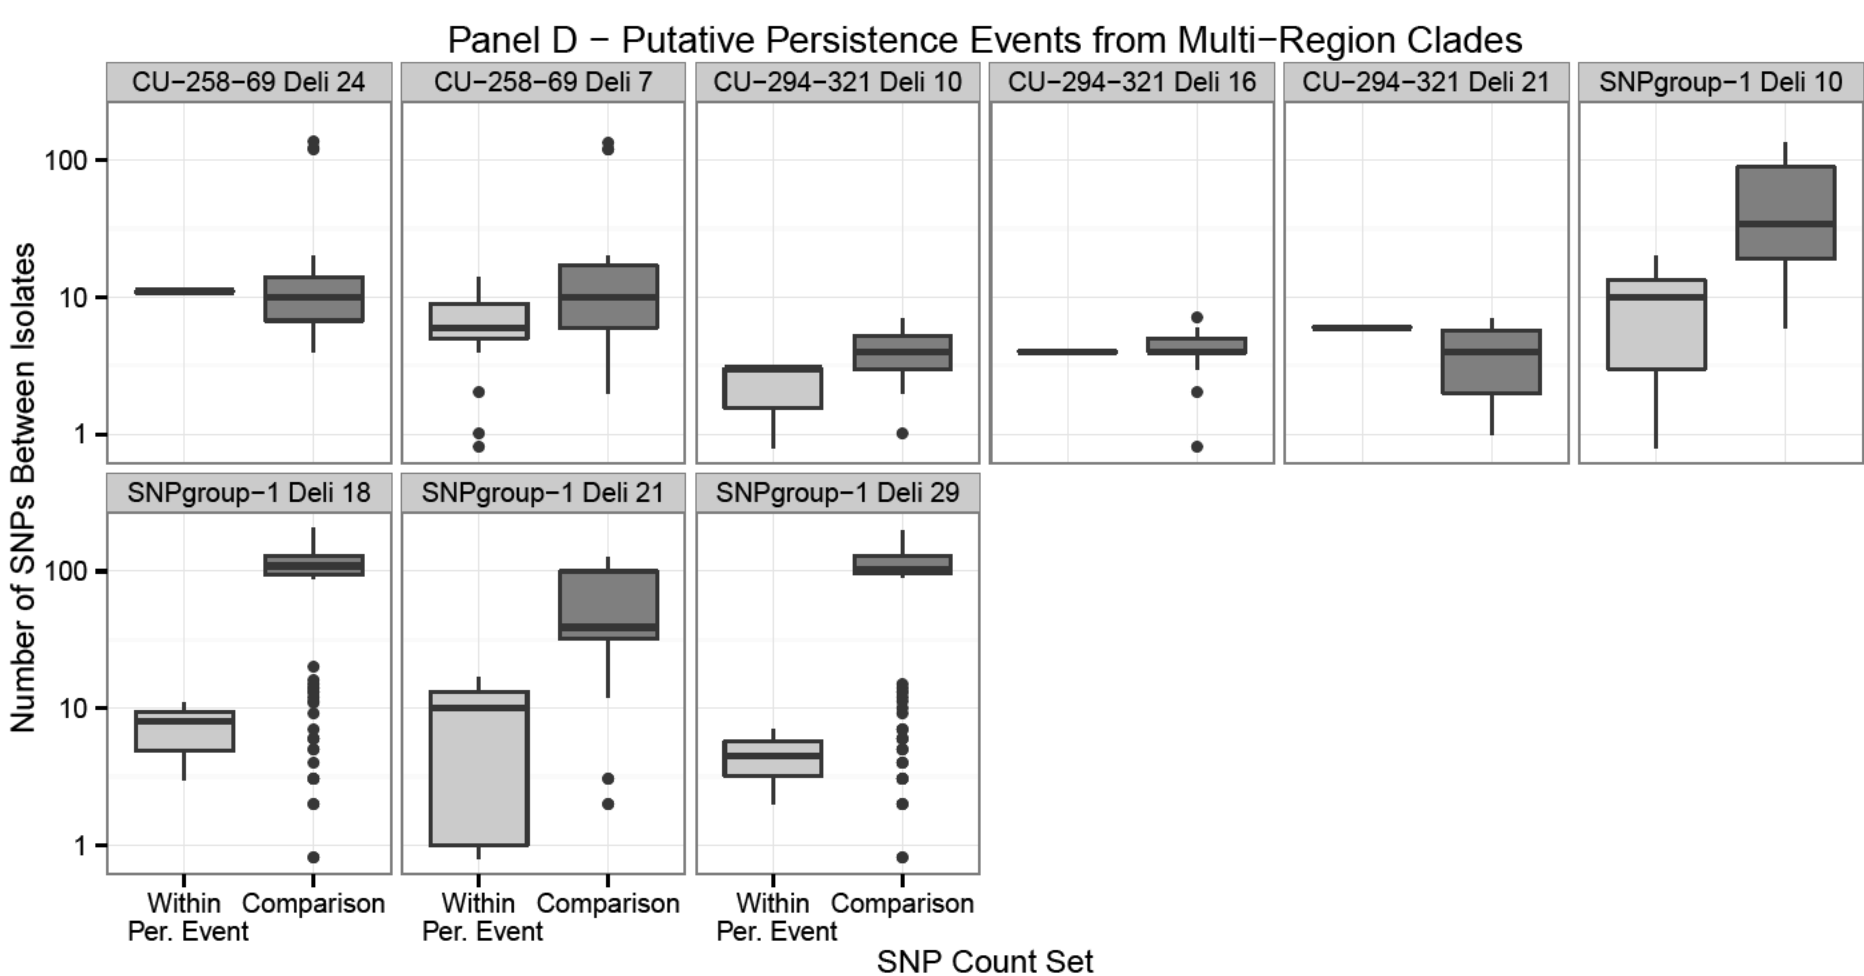

FIG S2. SNP count boxplots to identify persistent strains of *L. monocytogenes* using 14,846 core and accessory genome SNPs among lineage I isolates. Panel A, within persistence event SNP counts for isolates that form a deli specific clade where no comparison isolates of the same subtype are available. Panel B, within persistence event and comparison SNP counts for isolates that form a deli specific clade and comparison isolates are available. Panel C, SNP counts for putative persistence events for isolates that form a state specific clade. Panel D, SNP counts for putative persistence events for isolates that form a multi-state clade. To accommodate a log-scale y-axis, counts of zero SNP differences are plotted just below the 1 SNP difference y-axis minimum. For each box the solid line is the median SNP difference count, box height is the inner quartile range (IQR), whiskers extend to the most extreme value within 1.5\*IQR of the box, and outliers are plotted as points. There are two differences in grouping from the core SNPs boxplots (i) SNP group 3 has been separated into PFGE types CU-262-79 and CU-262-319, and (ii) five strains from SNP group 1 have been excluded as they are outliers from the SNP group 1 phylogenetic clade, see Fig. S3 for details.



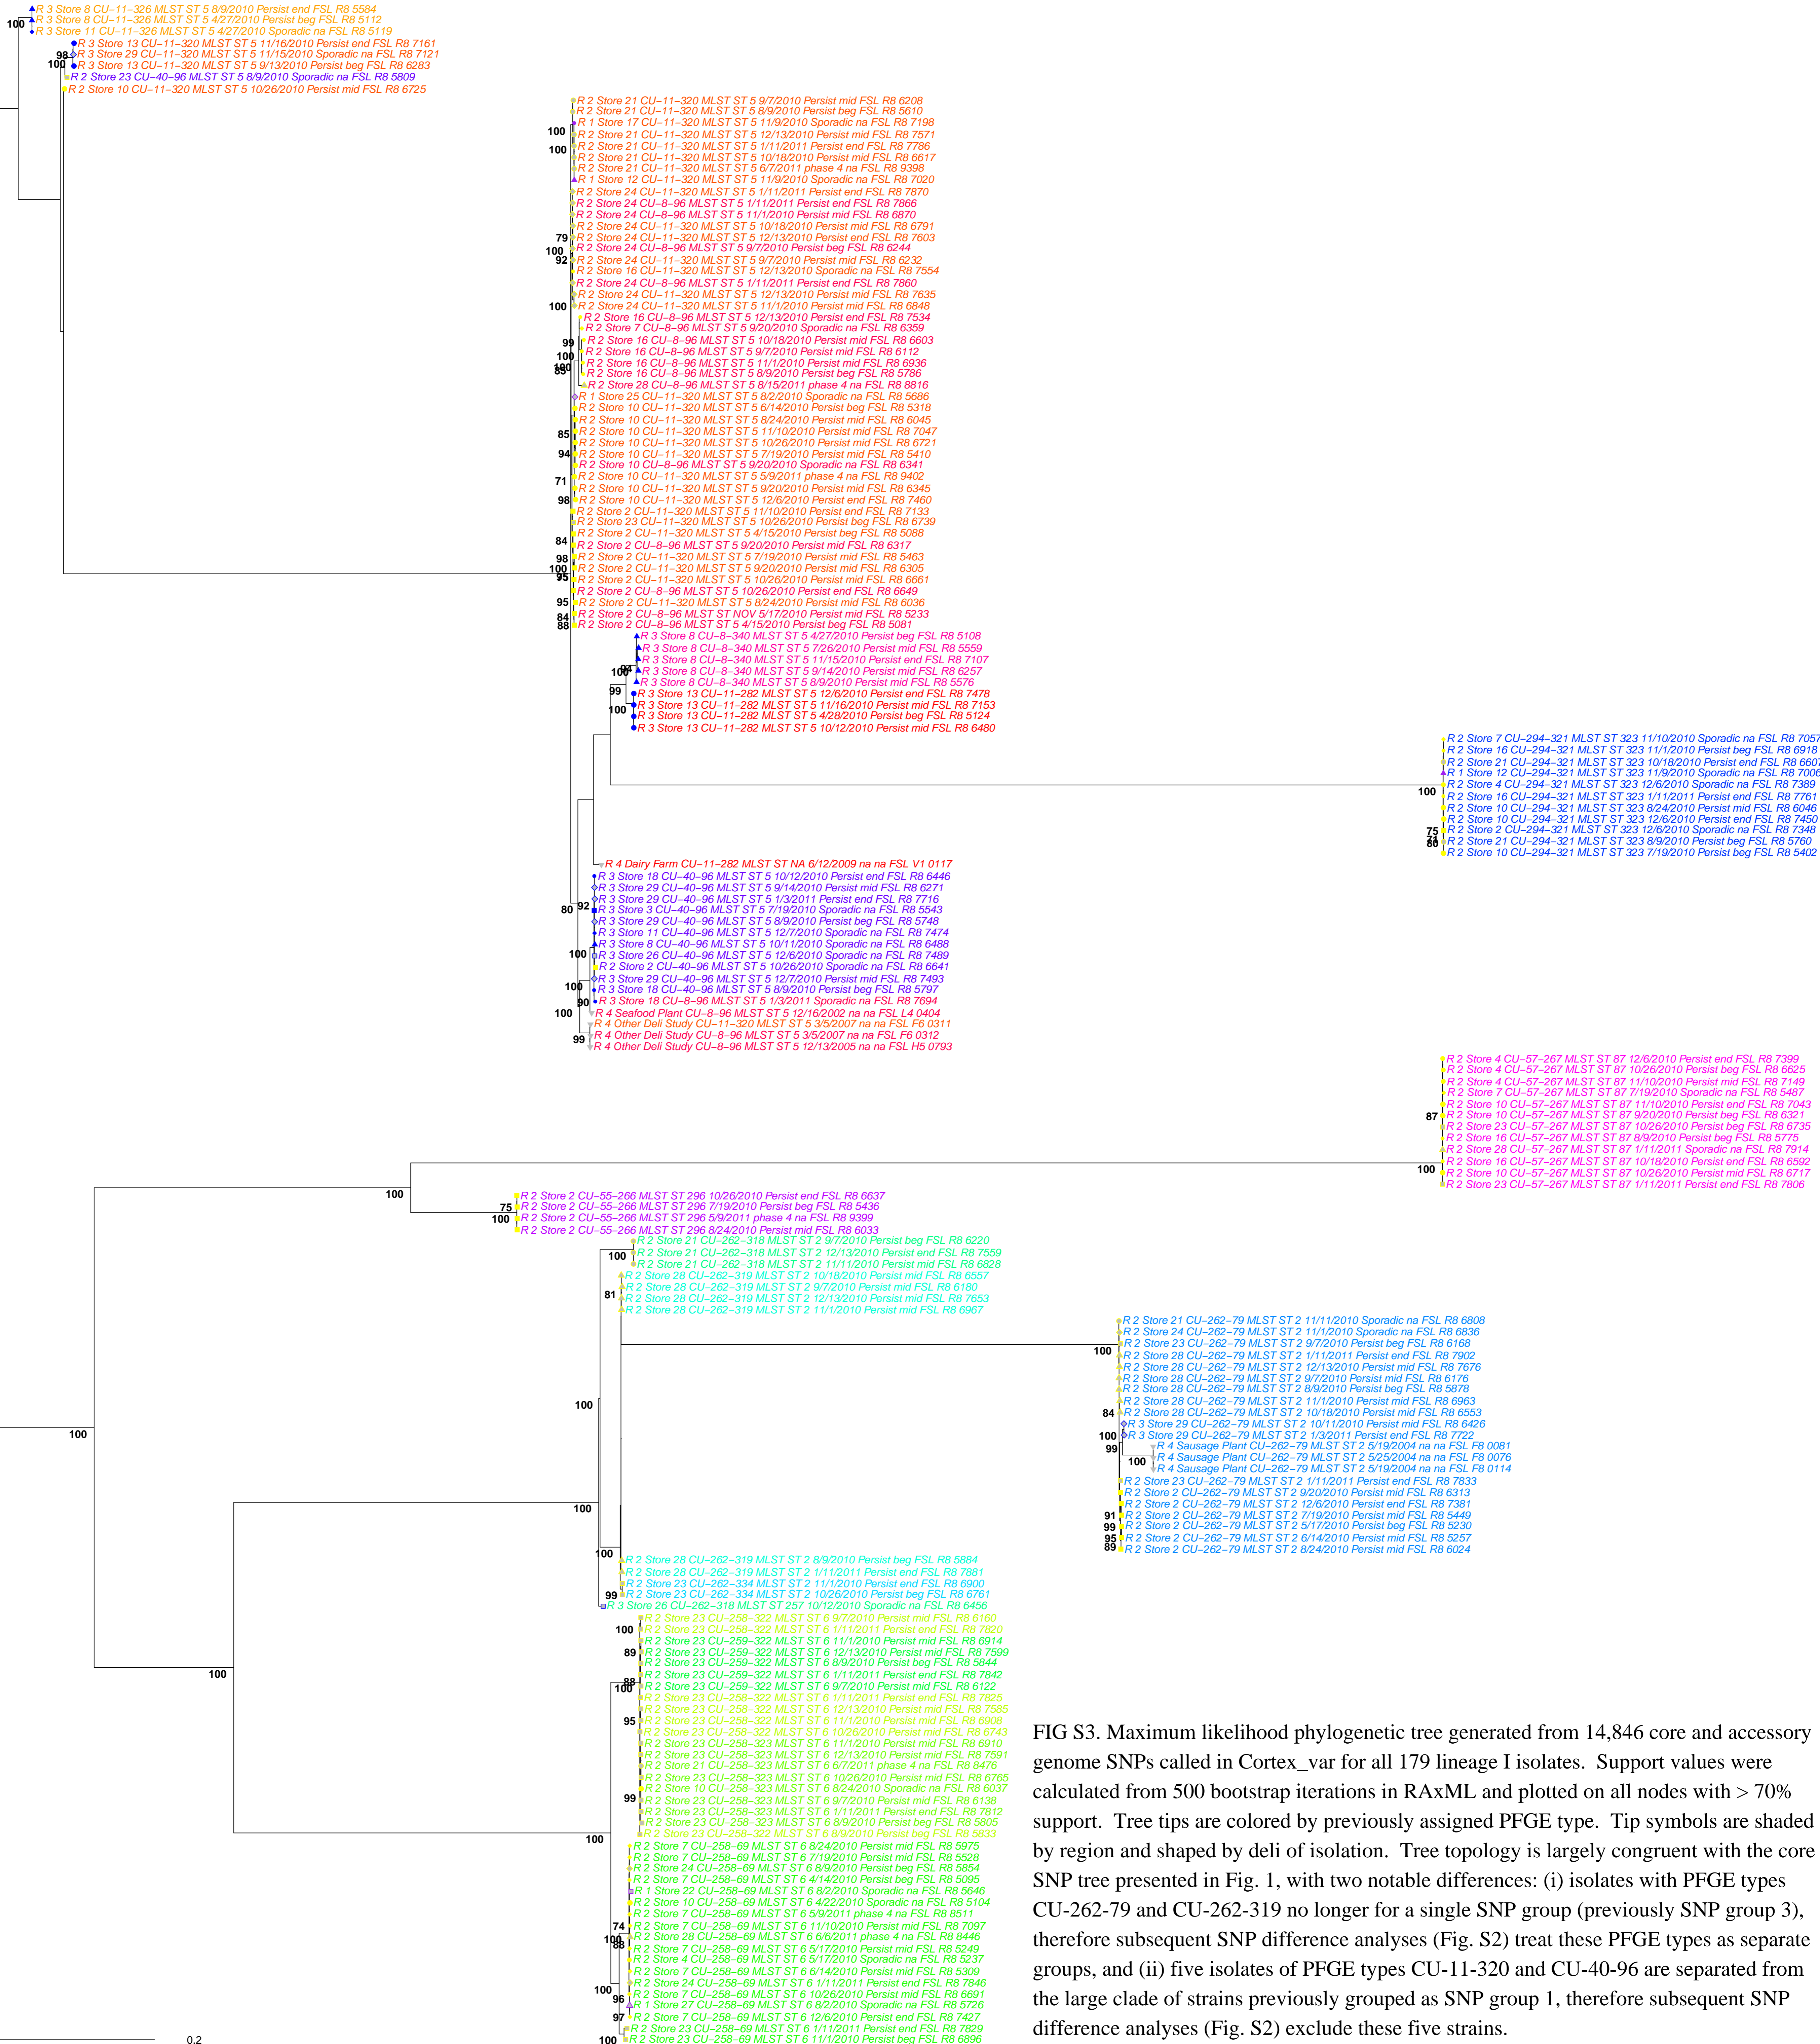

FIG S3. Maximum likelihood phylogenetic tree generated from 14,846 core and accessory genome SNPs called in Cortex\_var for all 179 lineage I isolates. Support values were calculated from 500 bootstrap iterations in RAxML and plotted on all nodes with > 70% support. Tree tips are colored by region and shaped by deli of isolation. Tree topology is largely congruent with the core SNP tree presented in Fig. 1, with two notable differences: (i) isolates with PFGE types CU-262-79 and CU-262-319 no longer for a single SNP group (previously SNP group 3), therefore subsequent SNP difference analyses (Fig. S2) treat these PFGE types as separate groups, and (ii) five isolates of PFGE types CU-11-320 and CU-40-96 are separated from the large clade of strains previously grouped as SNP group 1, therefore subsequent SNP difference analyses (Fig. S2) exclude these five strains.



Table S1. Strains sequence in this study

| FSL         | Source            | Date       | Status   | Timing | ITEP   |         | PFGE       | sigB<br>AT | MLST sequence type (ST) and individual gene allelic types |      |      |     |      |     |     |      | Ref |
|-------------|-------------------|------------|----------|--------|--------|---------|------------|------------|-----------------------------------------------------------|------|------|-----|------|-----|-----|------|-----|
|             |                   |            |          |        | Subset | Lineage |            |            | ST                                                        | abcZ | bgIA | cat | dapE | dat | ldh | lhkA |     |
| FSL F6-0311 | Other deli study* | 3/5/2007   | na       | na     | FALSE  | I       | CU-11-320  | 63         | 5                                                         | 2    | 1    | 11  | 3    | 3   | 1   | 7    | (1) |
| FSL F6-0312 | Other deli study  | 3/5/2007   | na       | na     | FALSE  | I       | CU-8-96    | 63         | 5                                                         | 2    | 1    | 11  | 3    | 3   | 1   | 7    | (1) |
| FSL F8-0076 | Sausage plant     | 5/25/2004  | na       | na     | FALSE  | I       | CU-262-79  | 58         | 2                                                         | 1    | 1    | 11  | 11   | 2   | 1   | 5    | (2) |
| FSL F8-0081 | Sausage plant     | 5/19/2004  | na       | na     | FALSE  | I       | CU-262-79  | 58         | 2                                                         | 1    | 1    | 11  | 11   | 2   | 1   | 5    | (2) |
| FSL F8-0114 | Sausage plant     | 5/19/2004  | na       | na     | FALSE  | I       | CU-262-79  | 58         | 2                                                         | 1    | 1    | 11  | 11   | 2   | 1   | 5    | (2) |
| FSL H5-0793 | Other deli study  | 12/13/2005 | na       | na     | FALSE  | I       | CU-8-96    | 63         | 5                                                         | 2    | 1    | 11  | 3    | 3   | 1   | 7    | (1) |
| FSL L3-0257 | Seafood plant     | 4/9/2002   | na       | na     | FALSE  | II      | CU-182-173 | 57         | 635                                                       | 23   | 29   | 3   | 30   | 6   | 6   | 1    | (3) |
| FSL L4-0396 | Seafood plant     | 12/16/2002 | na       | na     | FALSE  | II      | CU-182-173 | 57         | 635                                                       | 23   | 29   | 3   | 30   | 6   | 6   | 1    | (3) |
| FSL L4-0404 | Seafood plant     | 12/16/2002 | na       | na     | FALSE  | I       | CU-8-96    | 63         | 5                                                         | 2    | 1    | 11  | 3    | 3   | 1   | 7    | (3) |
| FSL N3-0993 | Dairy farm        | 5/29/2002  | na       | na     | FALSE  | II      | CU-11-282  | 57         | 364                                                       | 7    | 10   | 8   | 7    | 1   | 26  | 1    |     |
| FSL R8-5081 | Store 2           | 4/15/2010  | Persist  | beg    | TRUE   | I       | CU-8-96    | 63         | 5                                                         | 2    | 1    | 11  | 3    | 3   | 1   | 7    |     |
| FSL R8-5088 | Store 2           | 4/15/2010  | Persist  | beg    | TRUE   | I       | CU-11-320  | 63         | 5                                                         | 2    | 1    | 11  | 3    | 3   | 1   | 7    |     |
| FSL R8-5095 | Store 7           | 4/14/2010  | Persist  | beg    | TRUE   | I       | CU-258-69  | 64         | 6                                                         | 3    | 9    | 9   | 3    | 3   | 1   | 5    |     |
| FSL R8-5104 | Store 10          | 4/22/2010  | Sporadic | na     | TRUE   | I       | CU-258-69  | 64         | 6                                                         | 3    | 9    | 9   | 3    | 3   | 1   | 5    |     |
| FSL R8-5108 | Store 8           | 4/27/2010  | Persist  | beg    | TRUE   | I       | CU-8-340   | 63         | 5                                                         | 2    | 1    | 11  | 3    | 3   | 1   | 7    |     |
| FSL R8-5112 | Store 8           | 4/27/2010  | Persist  | beg    | TRUE   | I       | CU-11-326  | 63         | 5                                                         | 2    | 1    | 11  | 3    | 3   | 1   | 7    |     |
| FSL R8-5119 | Store 11          | 4/27/2010  | Sporadic | na     | TRUE   | I       | CU-11-326  | 63         | 5                                                         | 2    | 1    | 11  | 3    | 3   | 1   | 7    |     |
| FSL R8-5124 | Store 13          | 4/28/2010  | Persist  | beg    | TRUE   | I       | CU-11-282  | 63         | 5                                                         | 2    | 1    | 11  | 3    | 3   | 1   | 7    |     |
| FSL R8-5230 | Store 2           | 5/17/2010  | Persist  | beg    | TRUE   | I       | CU-262-79  | 58         | 2                                                         | 1    | 1    | 11  | 11   | 2   | 1   | 5    |     |
| FSL R8-5233 | Store 2           | 5/17/2010  | Persist  | mid    | FALSE  | I       | CU-8-96    | 63         | NOV                                                       | 2    | 1    | 11  | 3    | 3*? | 1   | 7    |     |
| FSL R8-5237 | Store 4           | 5/17/2010  | Sporadic | na     | TRUE   | I       | CU-258-69  | 64         | 6                                                         | 3    | 9    | 9   | 3    | 3   | 1   | 5    |     |
| FSL R8-5249 | Store 7           | 5/17/2010  | Persist  | mid    | FALSE  | I       | CU-258-69  | 64         | 6                                                         | 3    | 9    | 9   | 3    | 3   | 1   | 5    |     |
| FSL R8-5257 | Store 2           | 6/14/2010  | Persist  | mid    | FALSE  | I       | CU-262-79  | 58         | 2                                                         | 1    | 1    | 11  | 11   | 2   | 1   | 5    |     |
| FSL R8-5309 | Store 7           | 6/14/2010  | Persist  | mid    | FALSE  | I       | CU-258-69  | 64         | 6                                                         | 3    | 9    | 9   | 3    | 3   | 1   | 5    |     |
| FSL R8-5318 | Store 10          | 6/14/2010  | Persist  | beg    | TRUE   | I       | CU-11-320  | 63         | 5                                                         | 2    | 1    | 11  | 3    | 3   | 1   | 7    |     |
| FSL R8-5402 | Store 10          | 7/19/2010  | Persist  | beg    | TRUE   | I       | CU-294-321 | 60         | 323                                                       | 34   | 12   | 11  | 15   | 3   | 1   | 2    |     |
| FSL R8-5410 | Store 10          | 7/19/2010  | Persist  | mid    | FALSE  | I       | CU-11-320  | 63         | 5                                                         | 2    | 1    | 11  | 3    | 3   | 1   | 7    |     |
| FSL R8-5436 | Store 2           | 7/19/2010  | Persist  | beg    | TRUE   | I       | CU-55-266  | 61         | 296                                                       | 12   | 12   | 12  | 61   | 3   | 1   | 4    |     |
| FSL R8-5449 | Store 2           | 7/19/2010  | Persist  | mid    | FALSE  | I       | CU-262-79  | 58         | 2                                                         | 1    | 1    | 11  | 11   | 2   | 1   | 5    |     |
| FSL R8-5463 | Store 2           | 7/19/2010  | Persist  | mid    | FALSE  | I       | CU-11-320  | 63         | 5                                                         | 2    | 1    | 11  | 3    | 3   | 1   | 7    |     |
| FSL R8-5487 | Store 7           | 7/19/2010  | Sporadic | na     | TRUE   | I       | CU-57-267  | 61         | 87                                                        | 12   | 1    | 4   | 14   | 3   | 39  | 4    |     |
| FSL R8-5528 | Store 7           | 7/19/2010  | Persist  | mid    | TRUE   | I       | CU-258-69  | 64         | 6                                                         | 3    | 9    | 9   | 3    | 3   | 1   | 5    |     |
| FSL R8-5543 | Store 3           | 7/19/2010  | Sporadic | na     | TRUE   | I       | CU-40-96   | 63         | 5                                                         | 2    | 1    | 11  | 3    | 3   | 1   | 7    |     |
| FSL R8-5559 | Store 8           | 7/26/2010  | Persist  | mid    | FALSE  | I       | CU-8-340   | 63         | 5                                                         | 2    | 1    | 11  | 3    | 3   | 1   | 7    |     |
| FSL R8-5576 | Store 8           | 8/9/2010   | Persist  | mid    | TRUE   | I       | CU-8-340   | 63         | 5                                                         | 2    | 1    | 11  | 3    | 3   | 1   | 7    |     |
| FSL R8-5584 | Store 8           | 8/9/2010   | Persist  | end    | TRUE   | I       | CU-11-326  | 63         | 5                                                         | 2    | 1    | 11  | 3    | 3   | 1   | 7    |     |
| FSL R8-5610 | Store 21          | 8/9/2010   | Persist  | beg    | TRUE   | I       | CU-11-320  | 63         | 5                                                         | 2    | 1    | 11  | 3    | 3   | 1   | 7    |     |
| FSL R8-5646 | Store 22          | 8/2/2010   | Sporadic | na     | TRUE   | I       | CU-258-69  | 64         | 6                                                         | 3    | 9    | 9   | 3    | 3   | 1   | 5    |     |
| FSL R8-5686 | Store 25          | 8/2/2010   | Sporadic | na     | TRUE   | I       | CU-11-320  | 63         | 5                                                         | 2    | 1    | 11  | 3    | 3   | 1   | 7    |     |
| FSL R8-5726 | Store 27          | 8/2/2010   | Sporadic | na     | TRUE   | I       | CU-258-69  | 64         | 6                                                         | 3    | 9    | 9   | 3    | 3   | 1   | 5    |     |
| FSL R8-5744 | Store 29          | 8/9/2010   | Persist  | beg    | TRUE   | I       | CU-262-79  | 63         | 5                                                         | 2    | 1    | 11  | 3    | 3   | 1   | 7    |     |
| FSL R8-5748 | Store 29          | 8/9/2010   | Persist  | beg    | TRUE   | I       | CU-40-96   | 63         | 5                                                         | 2    | 1    | 11  | 3    | 3   | 1   | 7    |     |
| FSL R8-5760 | Store 21          | 8/9/2010   | Persist  | beg    | TRUE   | I       | CU-294-321 | 60         | 323                                                       | 34   | 12   | 11  | 15   | 3   | 1   | 2    |     |
| FSL R8-5775 | Store 16          | 8/9/2010   | Persist  | beg    | TRUE   | I       | CU-57-267  | 61         | 87                                                        | 12   | 1    | 4   | 14   | 3   | 39  | 4    |     |
| FSL R8-5786 | Store 16          | 8/9/2010   | Persist  | beg    | TRUE   | I       | CU-8-96    | 63         | 5                                                         | 2    | 1    | 11  | 3    | 3   | 1   | 7    |     |
| FSL R8-5797 | Store 18          | 8/9/2010   | Persist  | beg    | TRUE   | I       | CU-40-96   | 63         | 5                                                         | 2    | 1    | 11  | 3    | 3   | 1   | 7    |     |
| FSL R8-5805 | Store 23          | 8/9/2010   | Persist  | beg    | TRUE   | I       | CU-258-323 | 64         | 6                                                         | 3    | 9    | 9   | 3    | 3   | 1   | 5    |     |
| FSL R8-5809 | Store 23          | 8/9/2010   | Sporadic | na     | TRUE   | I       | CU-40-96   | 63         | 5                                                         | 2    | 1    | 11  | 3    | 3   | 1   | 7    |     |
| FSL R8-5833 | Store 23          | 8/9/2010   | Persist  | beg    | TRUE   | I       | CU-258-322 | 64         | 6                                                         | 3    | 9    | 9   | 3    | 3   | 1   | 5    |     |
| FSL R8-5844 | Store 23          | 8/9/2010   | Persist  | beg    | TRUE   | I       | CU-259-322 | 64         | 6                                                         | 3    | 9    | 9   | 3    | 3   | 1   | 5    |     |
| FSL R8-5854 | Store 24          | 8/9/2010   | Persist  | beg    | TRUE   | I       | CU-258-69  | 64         | 6                                                         | 3    | 9    | 9   | 3    | 3   | 1   | 5    |     |
| FSL R8-5866 | Store 24          | 8/9/2010   | Persist  | beg    | TRUE   | I       | CU-11-320  | 63         | 5                                                         | 2    | 1    | 11  | 3    | 3   | 1   | 7    |     |
| FSL R8-5878 | Store 28          | 8/9/2010   | Persist  | beg    | TRUE   | I       | CU-262-79  | 58         | 2                                                         | 1    | 1    | 11  | 11   | 2   | 1   | 5    |     |
| FSL R8-5884 | Store 28          | 8/9/2010   | Persist  | beg    | TRUE   | I       | CU-262-319 | 58         | 2                                                         | 1    | 1    | 11  | 11   | 2   | 1   | 5    |     |
| FSL R8-5975 | Store 7           | 8/24/2010  | Persist  | mid    | FALSE  | I       | CU-258-69  | 64         | 6                                                         | 3    | 9    | 9   | 3    | 3   | 1   | 5    |     |
| FSL R8-6024 | Store 2           | 8/24/2010  | Persist  | mid    | FALSE  | I       | CU-262-79  | 58         | 2                                                         | 1    | 1    | 11  | 11   | 2   | 1   | 5    |     |
| FSL R8-6033 | Store 2           | 8/24/2010  | Persist  | mid    | TRUE   | I       | CU-55-266  | 61         | 296                                                       | 12   | 12   | 12  | 61   | 3   | 1   | 4    |     |
| FSL R8-6036 | Store 2           | 8/24/2010  | Persist  | mid    | FALSE  | I       | CU-11-320  | 63         | 5                                                         | 2    | 1    | 11  | 3    | 3   | 1   | 7    |     |
| FSL R8-6037 | Store 10          | 8/24/2010  | Sporadic | na     | TRUE   | I       | CU-258-323 | 64         | 6                                                         | 3    | 9    | 9   | 3    | 3   | 1   | 5    |     |
| FSL R8-6045 | Store 10          | 8/24/2010  | Persist  | mid    | FALSE  | I       | CU-11-320  | 63         | 5                                                         | 2    | 1    | 11  | 3    | 3   | 1   | 7    |     |
| FSL R8-6046 | Store 10          | 8/24/2010  | Persist  | mid    | TRUE   | I       | CU-294-321 | 60         | 323                                                       | 34   | 12   | 11  | 15   | 3   | 1   | 2    |     |
| FSL R8-6112 | Store 16          | 9/7/2010   | Persist  | mid    | FALSE  | I       | CU-8-96    | 63         | 5                                                         | 2    | 1    | 11  | 3    | 3   | 1   | 7    |     |
| FSL R8-6122 | Store 23          | 9/7/2010   | Persist  | mid    | FALSE  | I       | CU-259-322 | 64         | 6                                                         | 3    | 9    | 9   | 3    | 3   | 1   | 5    |     |
| FSL R8-6134 | Store 23          | 9/7/2010   | Persist  | beg    | FALSE  | II      | CU-296-330 | 57         | 9                                                         | 6    | 5    | 6   | 4    | 1   | 4   | 1    |     |
| FSL R8-6138 | Store 23          | 9/7/2010   | Persist  | mid    | TRUE   | I       | CU-258-323 | 64         | 6                                                         | 3    | 9    | 9   | 3    | 3   | 1   | 5    |     |
| FSL R8-6160 | Store 23          | 9/7/2010   | Persist  | mid    | TRUE   | I       | CU-258-322 | 64         | 6                                                         | 3    | 9    | 9   | 3    | 3   | 1   | 5    |     |
| FSL R8-6168 | Store 23          | 9/7/2010   | Persist  | beg    | TRUE   | I       | CU-262-79  | 58         | 2                                                         | 1    | 1    | 11  | 11   | 2   | 1   | 5    |     |
| FSL R8-6176 | Store 28          | 9/7/2010   | Persist  | mid    | TRUE   | I       | CU-262-79  | 58         | 2                                                         | 1    | 1    | 11  | 11   | 2   | 1   | 5    |     |
| FSL R8-6180 | Store 28          | 9/7/2010   | Persist  | mid    | FALSE  | I       | CU-262-319 | 58         | 2                                                         | 1    | 1    | 11  | 11   | 2   | 1   | 5    |     |

| FSL         | Source   | Date       | Status   | Timing | ITEP   |         | PFGE       | sigB<br>AT | MLST sequence type (ST) and individual gene allelic types |      |      |     |      |     |     | Ref |      |
|-------------|----------|------------|----------|--------|--------|---------|------------|------------|-----------------------------------------------------------|------|------|-----|------|-----|-----|-----|------|
|             |          |            |          |        | Subset | Lineage |            |            | ST                                                        | abcZ | bgIA | cat | dapE | dat | ldh |     | lhkA |
| FSL R8-6208 | Store 21 | 9/7/2010   | Persist  | mid    | TRUE   | I       | CU-11-320  | 63         | 5                                                         | 2    | 1    | 11  | 3    | 3   | 1   | 7   |      |
| FSL R8-6220 | Store 21 | 9/7/2010   | Persist  | beg    | TRUE   | I       | CU-262-318 | 58         | 2                                                         | 1    | 1    | 11  | 11   | 2   | 1   | 5   |      |
| FSL R8-6232 | Store 24 | 9/7/2010   | Persist  | mid    | TRUE   | I       | CU-11-320  | 63         | 5                                                         | 2    | 1    | 11  | 3    | 3   | 1   | 7   |      |
| FSL R8-6244 | Store 24 | 9/7/2010   | Persist  | beg    | TRUE   | I       | CU-8-96    | 63         | 5                                                         | 2    | 1    | 11  | 3    | 3   | 1   | 7   |      |
| FSL R8-6257 | Store 8  | 9/14/2010  | Persist  | mid    | FALSE  | I       | CU-8-340   | 63         | 5                                                         | 2    | 1    | 11  | 3    | 3   | 1   | 7   |      |
| FSL R8-6271 | Store 29 | 9/14/2010  | Persist  | mid    | TRUE   | I       | CU-40-96   | 63         | 5                                                         | 2    | 1    | 11  | 3    | 3   | 1   | 7   |      |
| FSL R8-6283 | Store 13 | 9/13/2010  | Persist  | beg    | TRUE   | I       | CU-11-320  | 63         | 5                                                         | 2    | 1    | 11  | 3    | 3   | 1   | 7   |      |
| FSL R8-6305 | Store 2  | 9/20/2010  | Persist  | mid    | TRUE   | I       | CU-11-320  | 63         | 5                                                         | 2    | 1    | 11  | 3    | 3   | 1   | 7   |      |
| FSL R8-6313 | Store 2  | 9/20/2010  | Persist  | mid    | TRUE   | I       | CU-262-79  | 58         | 2                                                         | 1    | 1    | 11  | 11   | 2   | 1   | 5   |      |
| FSL R8-6317 | Store 2  | 9/20/2010  | Persist  | mid    | TRUE   | I       | CU-8-96    | 63         | 5                                                         | 2    | 1    | 11  | 3    | 3   | 1   | 7   |      |
| FSL R8-6321 | Store 10 | 9/20/2010  | Persist  | beg    | TRUE   | I       | CU-57-267  | 61         | 87                                                        | 12   | 1    | 4   | 14   | 3   | 39  | 4   |      |
| FSL R8-6341 | Store 10 | 9/20/2010  | Sporadic | na     | TRUE   | I       | CU-8-96    | 63         | 5                                                         | 2    | 1    | 11  | 3    | 3   | 1   | 7   |      |
| FSL R8-6345 | Store 10 | 9/20/2010  | Persist  | mid    | TRUE   | I       | CU-11-320  | 63         | 5                                                         | 2    | 1    | 11  | 3    | 3   | 1   | 7   |      |
| FSL R8-6359 | Store 7  | 9/20/2010  | Sporadic | na     | TRUE   | I       | CU-8-96    | 63         | 5                                                         | 2    | 1    | 11  | 3    | 3   | 1   | 7   |      |
| FSL R8-6373 | Store 19 | 9/27/2010  | Persist  | beg    | FALSE  | II      | CU-182-173 | 57         | 635                                                       | 23   | 29   | 3   | 30   | 6   | 6   | 1   |      |
| FSL R8-6426 | Store 29 | 10/11/2010 | Persist  | mid    | TRUE   | I       | CU-262-79  | 58         | 2                                                         | 1    | 1    | 11  | 11   | 2   | 1   | 5   |      |
| FSL R8-6446 | Store 18 | 10/12/2010 | Persist  | end    | TRUE   | I       | CU-40-96   | 63         | 5                                                         | 2    | 1    | 11  | 3    | 3   | 1   | 7   |      |
| FSL R8-6456 | Store 26 | 10/12/2010 | Sporadic | na     | TRUE   | I       | CU-262-318 | 58         | 257                                                       | 1    | 1    | 11  | 11   | 2   | 30  | 5   |      |
| FSL R8-6480 | Store 13 | 10/12/2010 | Persist  | mid    | FALSE  | I       | CU-11-282  | 63         | 5                                                         | 2    | 1    | 11  | 3    | 3   | 1   | 7   |      |
| FSL R8-6488 | Store 8  | 10/11/2010 | Sporadic | na     | TRUE   | I       | CU-40-96   | 63         | 5                                                         | 2    | 1    | 11  | 3    | 3   | 1   | 7   |      |
| FSL R8-6553 | Store 28 | 10/18/2010 | Persist  | mid    | FALSE  | I       | CU-262-79  | 58         | 2                                                         | 1    | 1    | 11  | 11   | 2   | 1   | 5   |      |
| FSL R8-6557 | Store 28 | 10/18/2010 | Persist  | mid    | FALSE  | I       | CU-262-319 | 58         | 2                                                         | 1    | 1    | 11  | 11   | 2   | 1   | 5   |      |
| FSL R8-6592 | Store 16 | 10/18/2010 | Persist  | end    | TRUE   | I       | CU-57-267  | 61         | 87                                                        | 12   | 1    | 4   | 14   | 3   | 39  | 4   |      |
| FSL R8-6603 | Store 16 | 10/18/2010 | Persist  | mid    | TRUE   | I       | CU-8-96    | 63         | 5                                                         | 2    | 1    | 11  | 3    | 3   | 1   | 7   |      |
| FSL R8-6607 | Store 21 | 10/18/2010 | Persist  | end    | TRUE   | I       | CU-294-321 | 60         | 323                                                       | 34   | 12   | 11  | 15   | 3   | 1   | 2   |      |
| FSL R8-6617 | Store 21 | 10/18/2010 | Persist  | mid    | FALSE  | I       | CU-11-320  | 63         | 5                                                         | 2    | 1    | 11  | 3    | 3   | 1   | 7   |      |
| FSL R8-6625 | Store 4  | 10/26/2010 | Persist  | beg    | TRUE   | I       | CU-57-267  | 61         | 87                                                        | 12   | 1    | 4   | 14   | 3   | 39  | 4   |      |
| FSL R8-6637 | Store 2  | 10/26/2010 | Persist  | end    | TRUE   | I       | CU-55-266  | 61         | 296                                                       | 12   | 12   | 12  | 61   | 3   | 1   | 4   |      |
| FSL R8-6641 | Store 2  | 10/26/2010 | Sporadic | na     | TRUE   | I       | CU-40-96   | 63         | 5                                                         | 2    | 1    | 11  | 3    | 3   | 1   | 7   |      |
| FSL R8-6649 | Store 2  | 10/26/2010 | Persist  | end    | TRUE   | I       | CU-8-96    | 63         | 5                                                         | 2    | 1    | 11  | 3    | 3   | 1   | 7   |      |
| FSL R8-6661 | Store 2  | 10/26/2010 | Persist  | mid    | FALSE  | I       | CU-11-320  | 63         | 5                                                         | 2    | 1    | 11  | 3    | 3   | 1   | 7   |      |
| FSL R8-6691 | Store 7  | 10/26/2010 | Persist  | mid    | FALSE  | I       | CU-258-69  | 64         | 6                                                         | 3    | 9    | 9   | 3    | 3   | 1   | 5   |      |
| FSL R8-6717 | Store 10 | 10/26/2010 | Persist  | mid    | TRUE   | I       | CU-57-267  | 61         | 87                                                        | 12   | 1    | 4   | 14   | 3   | 39  | 4   |      |
| FSL R8-6721 | Store 10 | 10/26/2010 | Persist  | mid    | FALSE  | I       | CU-11-320  | 63         | 5                                                         | 2    | 1    | 11  | 3    | 3   | 1   | 7   |      |
| FSL R8-6725 | Store 10 | 10/26/2010 | Persist  | mid    | FALSE  | I       | CU-11-320  | 63         | 5                                                         | 2    | 1    | 11  | 3    | 3   | 1   | 7   |      |
| FSL R8-6735 | Store 23 | 10/26/2010 | Persist  | beg    | TRUE   | I       | CU-57-267  | 61         | 87                                                        | 12   | 1    | 4   | 14   | 3   | 39  | 4   |      |
| FSL R8-6739 | Store 23 | 10/26/2010 | Persist  | beg    | TRUE   | I       | CU-11-320  | 63         | 5                                                         | 2    | 1    | 11  | 3    | 3   | 1   | 7   |      |
| FSL R8-6743 | Store 23 | 10/26/2010 | Persist  | mid    | FALSE  | I       | CU-258-322 | 64         | 6                                                         | 3    | 9    | 9   | 3    | 3   | 1   | 5   |      |
| FSL R8-6761 | Store 23 | 10/26/2010 | Persist  | beg    | TRUE   | I       | CU-262-334 | 58         | 2                                                         | 1    | 1    | 11  | 11   | 2   | 1   | 5   |      |
| FSL R8-6765 | Store 23 | 10/26/2010 | Persist  | mid    | FALSE  | I       | CU-258-323 | 64         | 6                                                         | 3    | 9    | 9   | 3    | 3   | 1   | 5   |      |
| FSL R8-6791 | Store 24 | 10/18/2010 | Persist  | mid    | FALSE  | I       | CU-11-320  | 63         | 5                                                         | 2    | 1    | 11  | 3    | 3   | 1   | 7   |      |
| FSL R8-6808 | Store 21 | 11/11/2010 | Sporadic | na     | TRUE   | I       | CU-262-79  | 58         | 2                                                         | 1    | 1    | 11  | 11   | 2   | 1   | 5   |      |
| FSL R8-6828 | Store 21 | 11/11/2010 | Persist  | mid    | TRUE   | I       | CU-262-318 | 58         | 2                                                         | 1    | 1    | 11  | 11   | 2   | 1   | 5   |      |
| FSL R8-6836 | Store 24 | 11/1/2010  | Sporadic | na     | TRUE   | I       | CU-262-79  | 58         | 2                                                         | 1    | 1    | 11  | 11   | 2   | 1   | 5   |      |
| FSL R8-6848 | Store 24 | 11/1/2010  | Persist  | mid    | FALSE  | I       | CU-11-320  | 63         | 5                                                         | 2    | 1    | 11  | 3    | 3   | 1   | 7   |      |
| FSL R8-6870 | Store 24 | 11/1/2010  | Persist  | mid    | TRUE   | I       | CU-8-96    | 63         | 5                                                         | 2    | 1    | 11  | 3    | 3   | 1   | 7   |      |
| FSL R8-6892 | Store 23 | 11/1/2010  | Persist  | end    | FALSE  | II      | CU-296-330 | 57         | 9                                                         | 6    | 5    | 6   | 4    | 1   | 4   | 1   |      |
| FSL R8-6896 | Store 23 | 11/1/2010  | Persist  | beg    | TRUE   | I       | CU-258-69  | 64         | 6                                                         | 3    | 9    | 9   | 3    | 3   | 1   | 5   |      |
| FSL R8-6900 | Store 23 | 11/1/2010  | Persist  | end    | TRUE   | I       | CU-262-334 | 58         | 2                                                         | 1    | 1    | 11  | 11   | 2   | 1   | 5   |      |
| FSL R8-6908 | Store 23 | 11/1/2010  | Persist  | mid    | FALSE  | I       | CU-258-322 | 64         | 6                                                         | 3    | 9    | 9   | 3    | 3   | 1   | 5   |      |
| FSL R8-6910 | Store 23 | 11/1/2010  | Persist  | mid    | FALSE  | I       | CU-258-323 | 64         | 6                                                         | 3    | 9    | 9   | 3    | 3   | 1   | 5   |      |
| FSL R8-6914 | Store 23 | 11/1/2010  | Persist  | mid    | FALSE  | I       | CU-259-322 | 64         | 6                                                         | 3    | 9    | 9   | 3    | 3   | 1   | 5   |      |
| FSL R8-6918 | Store 16 | 11/1/2010  | Persist  | beg    | TRUE   | I       | CU-294-321 | 60         | 323                                                       | 34   | 12   | 11  | 15   | 3   | 1   | 2   |      |
| FSL R8-6936 | Store 16 | 11/1/2010  | Persist  | mid    | FALSE  | I       | CU-8-96    | 63         | 5                                                         | 2    | 1    | 11  | 3    | 3   | 1   | 7   |      |
| FSL R8-6963 | Store 28 | 11/1/2010  | Persist  | mid    | FALSE  | I       | CU-262-79  | 58         | 2                                                         | 1    | 1    | 11  | 11   | 2   | 1   | 5   |      |
| FSL R8-6967 | Store 28 | 11/1/2010  | Persist  | mid    | FALSE  | I       | CU-262-319 | 58         | 2                                                         | 1    | 1    | 11  | 11   | 2   | 1   | 5   |      |
| FSL R8-7006 | Store 12 | 11/9/2010  | Sporadic | na     | TRUE   | I       | CU-294-321 | 60         | 323                                                       | 34   | 12   | 11  | 15   | 3   | 1   | 2   |      |
| FSL R8-7020 | Store 12 | 11/9/2010  | Sporadic | na     | TRUE   | I       | CU-11-320  | 63         | 5                                                         | 2    | 1    | 11  | 3    | 3   | 1   | 7   |      |
| FSL R8-7043 | Store 10 | 11/10/2010 | Persist  | end    | TRUE   | I       | CU-57-267  | 61         | 87                                                        | 12   | 1    | 4   | 14   | 3   | 39  | 4   |      |
| FSL R8-7047 | Store 10 | 11/10/2010 | Persist  | mid    | FALSE  | I       | CU-11-320  | 63         | 5                                                         | 2    | 1    | 11  | 3    | 3?  | 1   | 7   |      |
| FSL R8-7057 | Store 7  | 11/10/2010 | Sporadic | na     | TRUE   | I       | CU-294-321 | 60         | 323                                                       | 34   | 12   | 11  | 15   | 3   | 1   | 2   |      |
| FSL R8-7097 | Store 7  | 11/10/2010 | Persist  | mid    | FALSE  | I       | CU-258-69  | 64         | 6                                                         | 3    | 9    | 9   | 3    | 3   | 1   | 5   |      |
| FSL R8-7107 | Store 8  | 11/15/2010 | Persist  | end    | TRUE   | I       | CU-8-340   | 63         | 5                                                         | 2    | 1    | 11  | 3    | 3   | 1   | 7   |      |
| FSL R8-7121 | Store 29 | 11/15/2010 | Sporadic | na     | TRUE   | I       | CU-11-320  | 63         | 5                                                         | 2    | 1    | 11  | 3    | 3   | 1   | 7   |      |
| FSL R8-7133 | Store 2  | 11/10/2010 | Persist  | end    | TRUE   | I       | CU-11-320  | 63         | 5                                                         | 2    | 1    | 11  | 3    | 3   | 1   | 7   |      |
| FSL R8-7149 | Store 4  | 11/10/2010 | Persist  | mid    | TRUE   | I       | CU-57-267  | 61         | 87                                                        | 12   | 1    | 4   | 14   | 3   | 39  | 4   |      |
| FSL R8-7153 | Store 13 | 11/16/2010 | Persist  | mid    | TRUE   | I       | CU-11-282  | 63         | 5                                                         | 2    | 1    | 11  | 3    | 3   | 1   | 7   |      |
| FSL R8-7161 | Store 13 | 11/16/2010 | Persist  | end    | TRUE   | I       | CU-11-320  | 63         | 5                                                         | 2    | 1    | 11  | 3    | 3   | 1   | 7   |      |
| FSL R8-7198 | Store 17 | 11/9/2010  | Sporadic | na     | TRUE   | I       | CU-11-320  | 63         | 5                                                         | 2    | 1    | 11  | 3    | 3   | 1   | 7   |      |
| FSL R8-7348 | Store 2  | 12/6/2010  | Sporadic | na     | TRUE   | I       | CU-294-321 | 60         | 323                                                       | 34   | 12   | 11  | 15   | 3   | 1   | 2   |      |
| FSL R8-7381 | Store 2  | 12/6/2010  | Persist  | end    | TRUE   | I       | CU-262-79  | 58         | 2                                                         | 1    | 1    | 11  | 11   | 2   | 1   | 5   |      |

| FSL         | Source        | Date       | Status   | Timing | ITEP   |         | PFGE       | sigB<br>AT | MLST sequence type (ST) and individual gene allelic types |      |      |     |      |     |     |      | Ref |
|-------------|---------------|------------|----------|--------|--------|---------|------------|------------|-----------------------------------------------------------|------|------|-----|------|-----|-----|------|-----|
|             |               |            |          |        | Subset | Lineage |            |            | ST                                                        | abcZ | bglA | cat | dapE | dat | ldh | lhkA |     |
| FSL R8-7389 | Store 4       | 12/6/2010  | Sporadic | na     | TRUE   | I       | CU-294-321 | 60         | 323                                                       | 34   | 12   | 11  | 15   | 3   | 1   | 2    |     |
| FSL R8-7399 | Store 4       | 12/6/2010  | Persist  | end    | TRUE   | I       | CU-57-267  | 61         | 87                                                        | 12   | 1    | 4   | 14   | 3   | 39  | 4    |     |
| FSL R8-7427 | Store 7       | 12/6/2010  | Persist  | end    | TRUE   | I       | CU-258-69  | 64         | 6                                                         | 3    | 9    | 9   | 3    | 3   | 1   | 5    |     |
| FSL R8-7450 | Store 10      | 12/6/2010  | Persist  | end    | TRUE   | I       | CU-294-321 | 60         | 323                                                       | 34   | 12   | 11  | 15   | 3   | 1   | 2    |     |
| FSL R8-7460 | Store 10      | 12/6/2010  | Persist  | end    | TRUE   | I       | CU-11-320  | 63         | 5                                                         | 2    | 1    | 11  | 3    | 3   | 1   | 7    |     |
| FSL R8-7474 | Store 11      | 12/7/2010  | Sporadic | na     | TRUE   | I       | CU-40-96   | 63         | 5                                                         | 2    | 1    | 11  | 3    | 3   | 1   | 7    |     |
| FSL R8-7478 | Store 13      | 12/6/2010  | Persist  | end    | TRUE   | I       | CU-11-282  | 63         | 5                                                         | 2    | 1    | 11  | 3    | 3   | 1   | 7    |     |
| FSL R8-7489 | Store 26      | 12/6/2010  | Sporadic | na     | TRUE   | I       | CU-40-96   | 63         | 5                                                         | 2    | 1    | 11  | 3    | 3   | 1   | 7    |     |
| FSL R8-7493 | Store 29      | 12/7/2010  | Persist  | mid    | TRUE   | I       | CU-40-96   | 63         | 5                                                         | 2    | 1    | 11  | 3    | 3   | 1   | 7    |     |
| FSL R8-7534 | Store 16      | 12/13/2010 | Persist  | end    | TRUE   | I       | CU-8-96    | 63         | 5                                                         | 2    | 1    | 11  | 3    | 3   | 1   | 7    |     |
| FSL R8-7554 | Store 16      | 12/13/2010 | Sporadic | na     | TRUE   | I       | CU-11-320  | 63         | 5                                                         | 2    | 1    | 11  | 3    | 3   | 1   | 7    |     |
| FSL R8-7559 | Store 21      | 12/13/2010 | Persist  | end    | TRUE   | I       | CU-262-318 | 58         | 2                                                         | 1    | 1    | 11  | 11   | 2   | 1   | 5    |     |
| FSL R8-7571 | Store 21      | 12/13/2010 | Persist  | mid    | FALSE  | I       | CU-11-320  | 63         | 5                                                         | 2    | 1    | 11  | 3    | 3   | 1   | 7    |     |
| FSL R8-7585 | Store 23      | 12/13/2010 | Persist  | mid    | FALSE  | I       | CU-258-322 | 64         | 6                                                         | 3    | 9    | 9   | 3    | 3?  | 1   | 5    |     |
| FSL R8-7591 | Store 23      | 12/13/2010 | Persist  | mid    | FALSE  | I       | CU-258-323 | 64         | 6                                                         | 3    | 9    | 9   | 3    | 3   | 1   | 5    |     |
| FSL R8-7599 | Store 23      | 12/13/2010 | Persist  | mid    | TRUE   | I       | CU-259-322 | 64         | 6                                                         | 3    | 9    | 9   | 3    | 3   | 1   | 5    |     |
| FSL R8-7603 | Store 24      | 12/13/2010 | Persist  | end    | FALSE  | I       | CU-11-320  | 63         | 5                                                         | 2    | 1    | 11  | 3    | 3   | 1   | 7    |     |
| FSL R8-7635 | Store 24      | 12/13/2010 | Persist  | mid    | FALSE  | I       | CU-11-320  | 63         | 5                                                         | 2    | 1    | 11  | 3    | 3   | 1   | 7    |     |
| FSL R8-7653 | Store 28      | 12/13/2010 | Persist  | mid    | TRUE   | I       | CU-262-319 | 58         | 2                                                         | 1    | 1    | 11  | 11   | 2   | 1   | 5    |     |
| FSL R8-7676 | Store 28      | 12/13/2010 | Persist  | mid    | FALSE  | I       | CU-262-79  | 58         | 2                                                         | 1    | 1    | 11  | 11   | 2   | 1   | 5    |     |
| FSL R8-7694 | Store 18      | 1/3/2011   | Sporadic | na     | TRUE   | I       | CU-8-96    | 63         | 5                                                         | 2    | 1    | 11  | 3    | 3   | 1   | 7    |     |
| FSL R8-7716 | Store 29      | 1/3/2011   | Persist  | end    | TRUE   | I       | CU-40-96   | 63         | 5                                                         | 2    | 1    | 11  | 3    | 3   | 1   | 7    |     |
| FSL R8-7722 | Store 29      | 1/3/2011   | Persist  | end    | TRUE   | I       | CU-262-79  | 58         | 2                                                         | 1    | 1    | 11  | 11   | 2   | 1   | 5    |     |
| FSL R8-7761 | Store 16      | 1/11/2011  | Persist  | end    | TRUE   | I       | CU-294-321 | 60         | 323                                                       | 34   | 12   | 11  | 15   | 3   | 1   | 2    |     |
| FSL R8-7786 | Store 21      | 1/11/2011  | Persist  | end    | TRUE   | I       | CU-11-320  | 63         | 5                                                         | 2    | 1    | 11  | 3    | 3   | 1   | 7    |     |
| FSL R8-7806 | Store 23      | 1/11/2011  | Persist  | end    | TRUE   | I       | CU-57-267  | 61         | 87                                                        | 12   | 1    | 4   | 14   | 3   | 39  | 4    |     |
| FSL R8-7812 | Store 23      | 1/11/2011  | Persist  | end    | TRUE   | I       | CU-258-323 | 64         | 6                                                         | 3    | 9    | 9   | 3    | 3   | 1   | 5    |     |
| FSL R8-7820 | Store 23      | 1/11/2011  | Persist  | end    | TRUE   | I       | CU-258-322 | 64         | 6                                                         | 3    | 9    | 9   | 3    | 3   | 1   | 5    |     |
| FSL R8-7825 | Store 23      | 1/11/2011  | Persist  | end    | TRUE   | I       | CU-258-322 | 64         | 6                                                         | 3    | 9    | 9   | 3    | 3   | 1   | 5    |     |
| FSL R8-7829 | Store 23      | 1/11/2011  | Persist  | end    | TRUE   | I       | CU-258-69  | 64         | 6                                                         | 3    | 9    | 9   | 3    | 3   | 1   | 5    |     |
| FSL R8-7833 | Store 23      | 1/11/2011  | Persist  | end    | TRUE   | I       | CU-262-79  | 58         | 2                                                         | 1    | 1    | 11  | 11   | 2   | 1   | 5    |     |
| FSL R8-7842 | Store 23      | 1/11/2011  | Persist  | end    | TRUE   | I       | CU-259-322 | 64         | 6                                                         | 3    | 9    | 9   | 3    | 3   | 1   | 5    |     |
| FSL R8-7846 | Store 24      | 1/11/2011  | Persist  | end    | TRUE   | I       | CU-258-69  | 64         | 6                                                         | 3    | 9    | 9   | 3    | 3   | 1   | 5    |     |
| FSL R8-7860 | Store 24      | 1/11/2011  | Persist  | end    | TRUE   | I       | CU-8-96    | 63         | 5                                                         | 2    | 1    | 11  | 3    | 3   | 1   | 7    |     |
| FSL R8-7866 | Store 24      | 1/11/2011  | Persist  | na     | FALSE  | I       | CU-8-96    | 63         | 5                                                         | 2    | 1    | 11  | 3    | 3   | 1   | 7    |     |
| FSL R8-7870 | Store 24      | 1/11/2011  | Persist  | end    | TRUE   | I       | CU-11-320  | 63         | 5                                                         | 2    | 1    | 11  | 3    | 3   | 1   | 7    |     |
| FSL R8-7881 | Store 28      | 1/11/2011  | Persist  | end    | TRUE   | I       | CU-262-319 | 58         | 2                                                         | 1    | 1    | 11  | 11   | 2   | 1   | 5    |     |
| FSL R8-7902 | Store 28      | 1/11/2011  | Persist  | end    | TRUE   | I       | CU-262-79  | 58         | 2                                                         | 1    | 1    | 11  | 11   | 2   | 1   | 5    |     |
| FSL R8-7914 | Store 28      | 1/11/2011  | Sporadic | na     | TRUE   | I       | CU-57-267  | 61         | 87                                                        | 12   | 1    | 4   | 14   | 3   | 39  | 4    |     |
| FSL R8-7926 | Store 19      | 1/11/2011  | Persist  | end    | FALSE  | II      | CU-182-173 | 57         | 635                                                       | 23   | 29   | 3   | 30   | 6   | 6   | 1    |     |
| FSL R8-8446 | Store 28      | 6/6/2011   | phase 4  | na     | FALSE  | I       | CU-258-69  | 64         | 6                                                         | 3    | 9    | 9   | 3    | 3   | 1   | 5    |     |
| FSL R8-8476 | Store 21      | 6/7/2011   | phase 4  | na     | FALSE  | I       | CU-258-323 | 64         | 6                                                         | 3    | 9    | 9   | 3    | 3   | 1   | 5    |     |
| FSL R8-8511 | Store 7       | 5/9/2011   | phase 4  | na     | FALSE  | I       | CU-258-69  | 64         | 6                                                         | 3    | 9    | 9   | 3    | 3   | 1   | 5    |     |
| FSL R8-8816 | Store 28      | 8/15/2011  | phase 4  | na     | FALSE  | I       | CU-8-96    | 63         | 5                                                         | 2    | 1    | 11  | 3    | 3   | 1   | 7    |     |
| FSL R8-9398 | Store 21      | 6/7/2011   | phase 4  | na     | FALSE  | I       | CU-11-320  | 63         | 5                                                         | 2    | 1    | 11  | 3    | 3   | 1   | 7    |     |
| FSL R8-9399 | Store 2       | 5/9/2011   | phase 4  | na     | FALSE  | I       | CU-55-266  | 61         | 296                                                       | 12   | 12   | 12  | 61   | 3?  | 1   | 4    |     |
| FSL R8-9402 | Store 10      | 5/9/2011   | phase 4  | na     | FALSE  | I       | CU-11-320  | 63         | 5                                                         | 2    | 1    | 11  | 3    | 3   | 1   | 7    |     |
| FSL T1-0023 | Seafood plant | 3/1/2001   | na       | na     | FALSE  | II      | CU-182-173 | 57         | 635                                                       | 23   | 29   | 3   | 30   | 6   | 6   | 1    | (4) |
| FSL T1-0946 | Seafood plant | 11/1/2001  | na       | na     | FALSE  | II      | CU-182-173 | 57         | 635                                                       | 23   | 29   | 3   | 30   | 6   | 6   | 1    | (4) |
| FSL V1-0009 | Seafood plant | 10/28/2008 | na       | na     | FALSE  | II      | CU-182-173 | 57         | 635                                                       | 23   | 29   | 3   | 30   | 6   | 6   | 1    | (5) |
| FSL V1-0117 | Dairy farm    | 6/12/2009  | na       | na     | FALSE  | I       | CU-11-282  | 63         | insufficient data                                         |      |      |     |      |     |     |      | (5) |

\*Any isolate with a source not listed as "Store ###" was selected from comparison studies referenced in the last column and listed below.

Grey text isolate sequence data were later excluded from the study due to inconsistencies with previously reported molecular subtyping which suggest an incorrect isolate may have been sequenced

- (1) Sauders B. D., Sanchez M. D., Rice D. H., Corby J., Stich S., Fortes E. D., Roof S. E., Wiedmann M. 2009. Prevalence and molecular diversity of *Listeria monocytogenes* in retail establishments. *J. Food Prot.* 72:2337-2349.
- (2) Ferreira V., Barbosa J., Stasiewicz M., Vongkamjan K., Moreno Switt A., Hogg T., Gibbs P., Teixeira P., Wiedmann M. 2011. Diverse geno- and phenotypes of persistent *Listeria monocytogenes* isolates from fermented meat sausage production facilities in Portugal. *Appl. Environ. Microbiol.* 77:2701-2715.
- (3) Lappi V. R., Thimothe J., Nightingale K. K., Gall K., Scott V. N., Wiedmann M. 2004. Longitudinal studies on *Listeria* in smoked fish plants: impact of intervention strategies on contamination patterns. *J. Food Prot.* 67:2500-2514.
- (4) Thimothe J., Nightingale K. K., Gall K., Scott V. N., Wiedmann M. 2004. Tracking of *Listeria monocytogenes* in Smoked Fish Processing Plants. *J. Food Prot.* 67:328-341.
- (5) Vongkamjan K., Roof S., Stasiewicz M. J., Wiedmann M. 2013. Persistent *Listeria monocytogenes* subtypes isolated from a smoked fish processing facility included both phage susceptible and resistant isolates. *Food Microbiology.* 35:38-48.

Table S2 - Genome Sequence and Assembly Metrics

| FSL         | Sequence Read File Sizes |                                |              | Reference Mapping                        | De Novo Assembled, Filtered Contigs [ $>1X$ k-mer coverage, $>500$ bp] |                       |                    |                   | GenBank Accessions for BioProject PRJNA245909 |            |              |  |
|-------------|--------------------------|--------------------------------|--------------|------------------------------------------|------------------------------------------------------------------------|-----------------------|--------------------|-------------------|-----------------------------------------------|------------|--------------|--|
|             | Raw reads [Mb]           | Trimmed, Paired End reads [Mb] | Percent Loss | Average bp coverage via mapping to J1776 | Number of contigs                                                      | Total size of contigs | Median contig size | N50 contig length | BioSample                                     | SRA        | WGS version  |  |
|             | Max                      | 1570.6                         | 743.3        | -24%                                     | 359.0                                                                  | 456.0                 | 3.14E+06           | 156,963           | 5.56E+05                                      |            |              |  |
|             | Mean                     | 461.5                          | 212.7        | -50%                                     | 99.7                                                                   | 32.5                  | 3.06E+06           | 29,624            | 3.82E+05                                      |            |              |  |
|             | <b>Median</b>            | <b>439.3</b>                   | <b>200.7</b> | <b>-45%</b>                              | <b>93.6</b>                                                            | <b>26.0</b>           | <b>3.09E+06</b>    | <b>21,100</b>     | <b>4.49E+05</b>                               |            |              |  |
|             | Min                      | 44.9                           | 16.8         | -73%                                     | 8.0                                                                    | 12.0                  | 2.88E+06           | 1,778             | 1.14E+04                                      |            |              |  |
| FSL_F6_0311 | 695.3                    | 237.0                          | -66%         | 115.92                                   | 17                                                                     | 3.09E+06              | 36,481             | 5.46E+05          | SAMN02741455                                  | SRR1269954 | JOKS01000000 |  |
| FSL_F6_0312 | 184.7                    | 140.4                          | -24%         | 65.66                                    | 21                                                                     | 3.13E+06              | 17,648             | 5.08E+05          | SAMN02741456                                  | SRR1269955 | JOWB01000000 |  |
| FSL_F8_0076 | 677.5                    | 245.5                          | -64%         | 123.45                                   | 25                                                                     | 3.00E+06              | 35,860             | 3.32E+05          | SAMN02741457                                  | SRR1269956 | JOWC01000000 |  |
| FSL_F8_0081 | 789.0                    | 289.0                          | -63%         | 144.32                                   | 24                                                                     | 3.00E+06              | 42,749             | 3.32E+05          | SAMN02741458                                  | SRR1269957 | JOWD01000000 |  |
| FSL_F8_0114 | 528.3                    | 189.1                          | -64%         | 93.68                                    | 28                                                                     | 3.00E+06              | 16,978             | 3.31E+05          | SAMN02741459                                  | SRR1269958 | JOWE01000000 |  |
| FSL_H5_0793 | 333.8                    | 242.7                          | -27%         | 117.95                                   | 24                                                                     | 3.12E+06              | 23,454             | 5.08E+05          | SAMN02741460                                  | SRR1269959 | JOWF01000000 |  |
| FSL_L3_0257 | 303.1                    | 222.7                          | -27%         | 107.58                                   | 17                                                                     | 3.07E+06              | 49,052             | 5.35E+05          | SAMN02741461                                  | SRR1269960 | JOWG01000000 |  |
| FSL_L4_0396 | 300.4                    | 214.5                          | -29%         | 107.41                                   | 19                                                                     | 3.07E+06              | 22,765             | 5.35E+05          | SAMN02741462                                  | SRR1269961 | JOWH01000000 |  |
| FSL_L4_0404 | 259.2                    | 190.6                          | -26%         | 93.22                                    | 28                                                                     | 3.11E+06              | 8,824              | 5.08E+05          | SAMN02741463                                  | SRR1269962 | JOWI01000000 |  |
| FSL_R8_5081 | 382.1                    | 247.2                          | -35%         | 111.09                                   | 22                                                                     | 3.13E+06              | 32,606             | 4.49E+05          | SAMN02741465                                  | SRR1269964 | JOWK01000000 |  |
| FSL_R8_5088 | 405.2                    | 270.0                          | -33%         | 123.52                                   | 20                                                                     | 3.09E+06              | 17,183             | 5.08E+05          | SAMN02741466                                  | SRR1269965 | JOWL01000000 |  |
| FSL_R8_5095 | 349.8                    | 224.8                          | -36%         | 103.41                                   | 30                                                                     | 3.10E+06              | 16,522             | 2.55E+05          | SAMN02741467                                  | SRR1269966 | JOWM01000000 |  |
| FSL_R8_5104 | 176.4                    | 106.8                          | -39%         | 47.43                                    | 30                                                                     | 3.04E+06              | 37,886             | 2.58E+05          | SAMN02741468                                  | SRR1269967 | JOWN01000000 |  |
| FSL_R8_5108 | 152.2                    | 90.4                           | -41%         | 39.63                                    | 41                                                                     | 3.10E+06              | 13,075             | 2.61E+05          | SAMN02741469                                  | SRR1269968 | JOWO01000000 |  |
| FSL_R8_5112 | 208.8                    | 128.5                          | -38%         | 57.70                                    | 34                                                                     | 3.04E+06              | 29,390             | 2.60E+05          | SAMN02741470                                  | SRR1269969 | JOWP01000000 |  |
| FSL_R8_5119 | 844.4                    | 261.0                          | -69%         | 118.75                                   | 24                                                                     | 3.05E+06              | 48,384             | 2.83E+05          | SAMN02741471                                  | SRR1269970 | JOWQ01000000 |  |
| FSL_R8_5124 | 964.6                    | 297.0                          | -69%         | 136.17                                   | 32                                                                     | 3.06E+06              | 5,756              | 4.83E+05          | SAMN02741472                                  | SRR1269971 | JOWR01000000 |  |
| FSL_R8_5230 | 416.1                    | 272.9                          | -34%         | 125.32                                   | 40                                                                     | 3.06E+06              | 35,487             | 1.59E+05          | SAMN02741473                                  | SRR1269972 | JOWS01000000 |  |
| FSL_R8_5233 | 424.7                    | 236.1                          | -44%         | 109.30                                   | 87                                                                     | 3.12E+06              | 13,887             | 8.28E+04          | SAMN02741474                                  | SRR1269973 | JOWT01000000 |  |
| FSL_R8_5237 | 152.6                    | 76.9                           | -50%         | 34.92                                    | 55                                                                     | 3.09E+06              | 27,638             | 1.20E+05          | SAMN02741475                                  | SRR1269974 | JOWU01000000 |  |
| FSL_R8_5249 | 327.3                    | 205.8                          | -37%         | 92.30                                    | 28                                                                     | 3.10E+06              | 8,724              | 4.05E+05          | SAMN02741476                                  | SRR1269975 | JOWV01000000 |  |
| FSL_R8_5257 | 306.5                    | 187.4                          | -39%         | 84.54                                    | 31                                                                     | 3.06E+06              | 37,449             | 2.55E+05          | SAMN02741477                                  | SRR1269976 | JOJS01000000 |  |
| FSL_R8_5309 | 278.4                    | 179.9                          | -35%         | 82.45                                    | 25                                                                     | 3.10E+06              | 11,933             | 3.21E+05          | SAMN02741478                                  | SRR1269977 | JOWW01000000 |  |
| FSL_R8_5318 | 493.9                    | 156.3                          | -68%         | 71.56                                    | 29                                                                     | 3.09E+06              | 47,392             | 2.26E+05          | SAMN02741479                                  | SRR1269978 | JOWX01000000 |  |
| FSL_R8_5402 | 709.7                    | 234.7                          | -67%         | 111.28                                   | 20                                                                     | 2.95E+06              | 37,729             | 2.94E+05          | SAMN02741480                                  | SRR1269979 | JOWY01000000 |  |
| FSL_R8_5410 | 412.9                    | 268.2                          | -35%         | 122.29                                   | 26                                                                     | 3.09E+06              | 24,237             | 4.83E+05          | SAMN02741481                                  | SRR1269980 | JOWZ01000000 |  |
| FSL_R8_5436 | 456.1                    | 309.5                          | -32%         | 142.34                                   | 23                                                                     | 3.03E+06              | 39,702             | 3.54E+05          | SAMN02741482                                  | SRR1269981 | JOXA01000000 |  |
| FSL_R8_5449 | 548.6                    | 356.0                          | -35%         | 163.42                                   | 30                                                                     | 3.06E+06              | 42,036             | 2.56E+05          | SAMN02741483                                  | SRR1269982 | JOXB01000000 |  |
| FSL_R8_5463 | 373.0                    | 231.4                          | -38%         | 103.08                                   | 22                                                                     | 3.09E+06              | 17,211             | 4.82E+05          | SAMN02741484                                  | SRR1269932 | JOXC01000000 |  |
| FSL_R8_5487 | 1182.2                   | 743.3                          | -37%         | 358.98                                   | 16                                                                     | 2.89E+06              | 97,980             | 3.56E+05          | SAMN02741485                                  | SRR1269933 | JOXD01000000 |  |
| FSL_R8_5543 | 667.8                    | 212.7                          | -68%         | 97.64                                    | 23                                                                     | 3.06E+06              | 21,100             | 4.81E+05          | SAMN02741487                                  | SRR1269935 | JOXE01000000 |  |
| FSL_R8_5559 | 644.6                    | 199.7                          | -69%         | 88.28                                    | 47                                                                     | 3.11E+06              | 3,237              | 4.85E+05          | SAMN02741488                                  | SRR1269936 | JOXF01000000 |  |
| FSL_R8_5576 | 302.3                    | 194.5                          | -36%         | 85.31                                    | 47                                                                     | 3.11E+06              | 3,237              | 4.85E+05          | SAMN02741489                                  | SRR1269937 | JOXG01000000 |  |
| FSL_R8_5584 | 410.6                    | 275.2                          | -33%         | 124.88                                   | 22                                                                     | 3.05E+06              | 29,390             | 4.85E+05          | SAMN02741490                                  | SRR1269938 | JOXH01000000 |  |
| FSL_R8_5610 | 703.3                    | 449.2                          | -36%         | 207.30                                   | 21                                                                     | 3.10E+06              | 24,237             | 4.83E+05          | SAMN02741491                                  | SRR1269939 | JOXI01000000 |  |
| FSL_R8_5646 | 423.6                    | 253.5                          | -40%         | 114.36                                   | 21                                                                     | 3.10E+06              | 8,724              | 5.15E+05          | SAMN02741492                                  | SRR1269940 | JOXJ01000000 |  |
| FSL_R8_5686 | 561.4                    | 352.2                          | -37%         | 159.39                                   | 20                                                                     | 3.09E+06              | 24,237             | 5.08E+05          | SAMN02741493                                  | SRR1269941 | JOXK01000000 |  |
| FSL_R8_5726 | 734.1                    | 447.2                          | -39%         | 208.54                                   | 23                                                                     | 3.10E+06              | 6,494              | 5.15E+05          | SAMN02741494                                  | SRR1269942 | JOXL01000000 |  |
| FSL_R8_5748 | 753.9                    | 250.6                          | -67%         | 114.14                                   | 24                                                                     | 3.06E+06              | 21,100             | 3.00E+05          | SAMN02741496                                  | SRR1269944 | JOXN01000000 |  |
| FSL_R8_5760 | 369.8                    | 241.4                          | -35%         | 114.13                                   | 16                                                                     | 2.95E+06              | 97,984             | 4.81E+05          | SAMN02741497                                  | SRR1269945 | JOXO01000000 |  |
| FSL_R8_5775 | 460.5                    | 315.5                          | -31%         | 151.96                                   | 17                                                                     | 2.89E+06              | 8,857              | 3.56E+05          | SAMN02741498                                  | SRR1269946 | JOXP01000000 |  |
| FSL_R8_5786 | 526.3                    | 332.7                          | -37%         | 151.50                                   | 28                                                                     | 3.12E+06              | 17,211             | 5.08E+05          | SAMN02741499                                  | SRR1269947 | JOXQ01000000 |  |
| FSL_R8_5797 | 530.0                    | 331.5                          | -37%         | 149.96                                   | 19                                                                     | 3.06E+06              | 6,516              | 5.13E+05          | SAMN02741500                                  | SRR1269948 | JOXR01000000 |  |
| FSL_R8_5805 | 749.0                    | 474.2                          | -37%         | 209.70                                   | 27                                                                     | 3.11E+06              | 6,375              | 5.16E+05          | SAMN02741501                                  | SRR1269949 | JOXS01000000 |  |
| FSL_R8_5809 | 224.9                    | 135.1                          | -40%         | 61.29                                    | 22                                                                     | 3.11E+06              | 17,200             | 4.83E+05          | SAMN02741502                                  | SRR1269950 | JOXT01000000 |  |
| FSL_R8_5833 | 815.5                    | 259.1                          | -68%         | 114.73                                   | 35                                                                     | 3.14E+06              | 9,221              | 4.91E+05          | SAMN02741503                                  | SRR1269951 | JOXU01000000 |  |
| FSL_R8_5844 | 728.6                    | 240.4                          | -67%         | 107.25                                   | 30                                                                     | 3.11E+06              | 6,375              | 5.16E+05          | SAMN02741504                                  | SRR1269952 | JOXV01000000 |  |
| FSL_R8_5854 | 455.1                    | 307.3                          | -32%         | 139.80                                   | 22                                                                     | 3.10E+06              | 14,745             | 5.15E+05          | SAMN02741505                                  | SRR1269953 | JOXW01000000 |  |
| FSL_R8_5878 | 497.2                    | 320.7                          | -35%         | 148.33                                   | 30                                                                     | 3.06E+06              | 35,487             | 2.73E+05          | SAMN02741507                                  | SRR1270020 | JOXY01000000 |  |
| FSL_R8_5884 | 382.8                    | 233.7                          | -39%         | 104.44                                   | 30                                                                     | 3.11E+06              | 42,036             | 2.73E+05          | SAMN02741508                                  | SRR1270021 | JOXZ01000000 |  |
| FSL_R8_5975 | 450.1                    | 278.0                          | -38%         | 126.89                                   | 23                                                                     | 3.10E+06              | 6,494              | 5.15E+05          | SAMN02741509                                  | SRR1270022 | JOYA01000000 |  |
| FSL_R8_6024 | 1471.6                   | 552.5                          | -62%         | 253.38                                   | 29                                                                     | 3.06E+06              | 42,749             | 2.56E+05          | SAMN02741510                                  | SRR1269915 | JOYB01000000 |  |

| FSL         | Sequence Read File Sizes |                                |              | Reference Mapping                        | De Novo Assembled, Filtered Contigs [ $>1X$ k-mer coverage, $>500$ bp] |                       |                    |                   | GenBank Accessions for BioProject PRJNA245909 |            |              |
|-------------|--------------------------|--------------------------------|--------------|------------------------------------------|------------------------------------------------------------------------|-----------------------|--------------------|-------------------|-----------------------------------------------|------------|--------------|
|             | Raw reads [Mb]           | Trimmed, Paired End reads [Mb] | Percent Loss | Average bp coverage via mapping to J1776 | Number of contigs                                                      | Total size of contigs | Median contig size | N50 contig length | BioSample                                     | SRA        | WGS version  |
|             |                          |                                |              |                                          |                                                                        |                       |                    |                   |                                               |            |              |
| FSL_R8_6033 | 752.1                    | 242.0                          | -68%         | 111.15                                   | 26                                                                     | 3.03E+06              | 49,696             | 3.41E+05          | SAMN02741511                                  | SRR1269916 | JOYC01000000 |
| FSL_R8_6036 | 673.7                    | 224.1                          | -67%         | 99.92                                    | 20                                                                     | 3.09E+06              | 3,295              | 5.21E+05          | SAMN02741512                                  | SRR1269917 | JOYD01000000 |
| FSL_R8_6037 | 330.5                    | 211.6                          | -36%         | 92.77                                    | 29                                                                     | 3.11E+06              | 3,885              | 5.16E+05          | SAMN02741513                                  | SRR1269918 | JOYE01000000 |
| FSL_R8_6045 | 657.0                    | 435.4                          | -34%         | 199.39                                   | 18                                                                     | 3.10E+06              | 17,211             | 5.21E+05          | SAMN02741514                                  | SRR1269919 | JOYF01000000 |
| FSL_R8_6046 | 460.9                    | 291.1                          | -37%         | 138.28                                   | 18                                                                     | 2.95E+06              | 97,984             | 4.81E+05          | SAMN02741515                                  | SRR1269920 | JOYG01000000 |
| FSL_R8_6112 | 918.2                    | 594.3                          | -35%         | 261.51                                   | 27                                                                     | 3.13E+06              | 3,295              | 5.08E+05          | SAMN02741516                                  | SRR1269921 | JOYH01000000 |
| FSL_R8_6122 | 542.8                    | 336.6                          | -38%         | 148.50                                   | 27                                                                     | 2.88E+06              | 6,122              | 5.16E+05          | SAMN02741517                                  | SRR1269922 | JOYI01000000 |
| FSL_R8_6134 | 717.9                    | 243.6                          | -66%         | 109.31                                   | 19                                                                     | 3.02E+06              | 64,240             | 5.04E+05          | SAMN02741518                                  | SRR1269923 | JOYJ01000000 |
| FSL_R8_6138 | 712.0                    | 228.7                          | -68%         | 102.06                                   | 33                                                                     | 3.11E+06              | 5,108              | 4.80E+05          | SAMN02741519                                  | SRR1269924 | JOYK01000000 |
| FSL_R8_6160 | 638.7                    | 211.2                          | -67%         | 93.41                                    | 40                                                                     | 3.14E+06              | 3,993              | 5.10E+05          | SAMN02741520                                  | SRR1269925 | JOYL01000000 |
| FSL_R8_6168 | 273.8                    | 168.9                          | -38%         | 77.72                                    | 29                                                                     | 3.01E+06              | 35,487             | 2.73E+05          | SAMN02741521                                  | SRR1269926 | JOYM01000000 |
| FSL_R8_6176 | 305.7                    | 201.6                          | -34%         | 91.70                                    | 32                                                                     | 3.06E+06              | 35,487             | 2.73E+05          | SAMN02741522                                  | SRR1269927 | JOYN01000000 |
| FSL_R8_6180 | 519.5                    | 324.9                          | -37%         | 148.44                                   | 29                                                                     | 3.11E+06              | 35,487             | 2.73E+05          | SAMN02741523                                  | SRR1269928 | JOYO01000000 |
| FSL_R8_6208 | 646.2                    | 403.2                          | -38%         | 180.48                                   | 18                                                                     | 3.10E+06              | 17,211             | 5.21E+05          | SAMN02741524                                  | SRR1269929 | JOYP01000000 |
| FSL_R8_6220 | 677.0                    | 441.2                          | -35%         | 196.98                                   | 24                                                                     | 3.10E+06              | 42,749             | 3.32E+05          | SAMN02741525                                  | SRR1269930 | JOYQ01000000 |
| FSL_R8_6232 | 1570.6                   | 520.7                          | -67%         | 233.38                                   | 18                                                                     | 3.10E+06              | 17,211             | 5.21E+05          | SAMN02741526                                  | SRR1269931 | JOYR01000000 |
| FSL_R8_6244 | 994.2                    | 324.2                          | -67%         | 145.27                                   | 20                                                                     | 3.13E+06              | 53,770             | 4.49E+05          | SAMN02741527                                  | SRR1269992 | JOYS01000000 |
| FSL_R8_6257 | 857.7                    | 291.6                          | -66%         | 127.35                                   | 44                                                                     | 3.10E+06              | 3,928              | 4.85E+05          | SAMN02741528                                  | SRR1269993 | JOYT01000000 |
| FSL_R8_6271 | 397.5                    | 247.7                          | -38%         | 113.90                                   | 26                                                                     | 3.06E+06              | 73,237             | 3.23E+05          | SAMN02741529                                  | SRR1269994 | JOYU01000000 |
| FSL_R8_6283 | 346.5                    | 231.0                          | -33%         | 100.60                                   | 21                                                                     | 3.12E+06              | 9,206              | 5.19E+05          | SAMN02741530                                  | SRR1269995 | JOYV01000000 |
| FSL_R8_6305 | 605.9                    | 377.7                          | -38%         | 175.56                                   | 23                                                                     | 3.09E+06              | 29,914             | 4.83E+05          | SAMN02741531                                  | SRR1269996 | JOYW01000000 |
| FSL_R8_6313 | 363.0                    | 231.9                          | -36%         | 105.53                                   | 30                                                                     | 3.06E+06              | 35,487             | 2.56E+05          | SAMN02741532                                  | SRR1269997 | JOYX01000000 |
| FSL_R8_6317 | 629.1                    | 308.7                          | -51%         | 140.98                                   | 22                                                                     | 3.13E+06              | 24,509             | 5.08E+05          | SAMN02741533                                  | SRR1269998 | JOYY01000000 |
| FSL_R8_6321 | 1058.6                   | 320.7                          | -70%         | 155.94                                   | 16                                                                     | 2.89E+06              | 97,980             | 3.56E+05          | SAMN02741534                                  | SRR1269999 | JOYZ01000000 |
| FSL_R8_6341 | 726.5                    | 196.9                          | -73%         | 90.03                                    | 31                                                                     | 3.12E+06              | 3,295              | 5.08E+05          | SAMN02741535                                  | SRR1270000 | JOZA01000000 |
| FSL_R8_6345 | 542.4                    | 169.8                          | -69%         | 77.19                                    | 22                                                                     | 3.09E+06              | 29,914             | 4.83E+05          | SAMN02741536                                  | SRR1270001 | JOZB01000000 |
| FSL_R8_6359 | 221.9                    | 136.2                          | -39%         | 60.88                                    | 31                                                                     | 3.12E+06              | 17,173             | 2.68E+05          | SAMN02741537                                  | SRR1270002 | JOZC01000000 |
| FSL_R8_6373 | 301.5                    | 193.0                          | -36%         | 87.57                                    | 23                                                                     | 3.07E+06              | 11,083             | 5.04E+05          | SAMN02741538                                  | SRR1270003 | JOZD01000000 |
| FSL_R8_6426 | 362.0                    | 226.7                          | -37%         | 104.83                                   | 29                                                                     | 3.06E+06              | 35,672             | 2.73E+05          | SAMN02741539                                  | SRR1270004 | JOZE01000000 |
| FSL_R8_6446 | 503.0                    | 318.6                          | -37%         | 142.65                                   | 20                                                                     | 3.06E+06              | 17,201             | 5.13E+05          | SAMN02741540                                  | SRR1270005 | JOZF01000000 |
| FSL_R8_6456 | 85.4                     | 34.7                           | -59%         | 15.87                                    | 137                                                                    | 2.99E+06              | 11,905             | 4.23E+04          | SAMN02741541                                  | SRR1270006 | JOZG01000000 |
| FSL_R8_6480 | 1090.5                   | 365.8                          | -66%         | 167.03                                   | 29                                                                     | 3.06E+06              | 9,205              | 4.83E+05          | SAMN02741542                                  | SRR1270007 | JOZH01000000 |
| FSL_R8_6488 | 615.0                    | 198.9                          | -68%         | 91.37                                    | 23                                                                     | 3.06E+06              | 6,516              | 5.08E+05          | SAMN02741543                                  | SRR1270008 | JOZI01000000 |
| FSL_R8_6553 | 573.2                    | 176.7                          | -69%         | 81.42                                    | 28                                                                     | 3.01E+06              | 35,487             | 2.73E+05          | SAMN02741544                                  | SRR1270009 | JOZJ01000000 |
| FSL_R8_6557 | 416.3                    | 275.1                          | -34%         | 123.86                                   | 28                                                                     | 3.11E+06              | 42,749             | 2.73E+05          | SAMN02741545                                  | SRR1270010 | JOZK01000000 |
| FSL_R8_6592 | 260.5                    | 173.5                          | -33%         | 82.58                                    | 17                                                                     | 2.89E+06              | 6,728              | 3.56E+05          | SAMN02741546                                  | SRR1270011 | JOZL01000000 |
| FSL_R8_6603 | 376.7                    | 249.2                          | -34%         | 111.69                                   | 31                                                                     | 3.12E+06              | 4,185              | 4.51E+05          | SAMN02741547                                  | SRR1270012 | JOZM01000000 |
| FSL_R8_6607 | 339.5                    | 220.4                          | -35%         | 102.56                                   | 19                                                                     | 2.95E+06              | 6,757              | 4.80E+05          | SAMN02741548                                  | SRR1270013 | JOZN01000000 |
| FSL_R8_6617 | 330.3                    | 220.8                          | -33%         | 97.48                                    | 12                                                                     | 3.06E+06              | 152,843            | 5.56E+05          | SAMN02741549                                  | SRR1270014 | JOZO01000000 |
| FSL_R8_6625 | 622.8                    | 203.8                          | -67%         | 98.35                                    | 16                                                                     | 2.89E+06              | 98,006             | 3.56E+05          | SAMN02741550                                  | SRR1270015 | JOZP01000000 |
| FSL_R8_6637 | 459.4                    | 143.4                          | -69%         | 65.42                                    | 24                                                                     | 3.03E+06              | 28,795             | 3.54E+05          | SAMN02741551                                  | SRR1270016 | JOZQ01000000 |
| FSL_R8_6641 | 709.1                    | 242.0                          | -66%         | 111.98                                   | 14                                                                     | 3.01E+06              | 152,851            | 5.13E+05          | SAMN02741552                                  | SRR1270017 | JOZR01000000 |
| FSL_R8_6649 | 208.5                    | 126.3                          | -39%         | 56.66                                    | 23                                                                     | 3.13E+06              | 24,426             | 4.83E+05          | SAMN02741553                                  | SRR1270018 | JOZS01000000 |
| FSL_R8_6661 | 404.1                    | 280.4                          | -31%         | 126.45                                   | 23                                                                     | 3.10E+06              | 3,948              | 5.21E+05          | SAMN02741554                                  | SRR1270028 | JOZT01000000 |
| FSL_R8_6691 | 283.3                    | 183.7                          | -35%         | 82.66                                    | 34                                                                     | 3.10E+06              | 8,910              | 2.87E+05          | SAMN02741555                                  | SRR1270029 | JOZU01000000 |
| FSL_R8_6717 | 310.5                    | 203.4                          | -35%         | 95.92                                    | 17                                                                     | 2.89E+06              | 41,530             | 3.56E+05          | SAMN02741556                                  | SRR1270030 | JOZV01000000 |
| FSL_R8_6721 | 167.8                    | 105.1                          | -37%         | 47.55                                    | 31                                                                     | 3.09E+06              | 17,211             | 2.88E+05          | SAMN02741557                                  | SRR1270031 | JOZW01000000 |
| FSL_R8_6725 | 502.2                    | 162.3                          | -68%         | 73.62                                    | 23                                                                     | 3.10E+06              | 6,452              | 5.08E+05          | SAMN02741558                                  | SRR1270032 | JOZX01000000 |
| FSL_R8_6735 | 716.3                    | 235.9                          | -67%         | 114.61                                   | 16                                                                     | 2.89E+06              | 98,006             | 3.56E+05          | SAMN02741559                                  | SRR1270033 | JOZY01000000 |
| FSL_R8_6739 | 770.4                    | 257.7                          | -67%         | 116.21                                   | 23                                                                     | 3.09E+06              | 29,914             | 4.83E+05          | SAMN02741560                                  | SRR1270112 | JOZZ01000000 |
| FSL_R8_6743 | 749.7                    | 274.9                          | -63%         | 128.28                                   | 37                                                                     | 3.14E+06              | 7,101              | 5.15E+05          | SAMN02741561                                  | SRR1270034 | JPAA01000000 |
| FSL_R8_6761 | 727.0                    | 254.5                          | -65%         | 123.47                                   | 38                                                                     | 3.13E+06              | 17,763             | 2.73E+05          | SAMN02741562                                  | SRR1270035 | JPAB01000000 |
| FSL_R8_6765 | 384.2                    | 137.4                          | -64%         | 65.70                                    | 37                                                                     | 3.11E+06              | 4,113              | 3.24E+05          | SAMN02741563                                  | SRR1270036 | JPAC01000000 |
| FSL_R8_6791 | 395.8                    | 138.1                          | -65%         | 65.66                                    | 22                                                                     | 3.09E+06              | 26,092             | 5.08E+05          | SAMN02741564                                  | SRR1270037 | JPAD01000000 |
| FSL_R8_6808 | 749.5                    | 266.2                          | -64%         | 134.11                                   | 29                                                                     | 3.06E+06              | 35,487             | 2.73E+05          | SAMN02741565                                  | SRR1270038 | JPAE01000000 |
| FSL_R8_6828 | 258.7                    | 191.1                          | -26%         | 91.08                                    | 24                                                                     | 3.10E+06              | 29,858             | 3.32E+05          | SAMN02741566                                  | SRR1270039 | JPAF01000000 |
| FSL_R8_6836 | 228.8                    | 164.9                          | -28%         | 82.33                                    | 28                                                                     | 3.06E+06              | 42,749             | 2.73E+05          | SAMN02741567                                  | SRR1269983 | JPAG01000000 |



| FSL         | Sequence Read File Sizes |                                |              | Reference Mapping                        | De Novo Assembled, Filtered Contigs [ $>1X$ k-mer coverage, $>500$ bp] |                       |                    |                   | GenBank Accessions for BioProject PRJNA245909 |            |              |
|-------------|--------------------------|--------------------------------|--------------|------------------------------------------|------------------------------------------------------------------------|-----------------------|--------------------|-------------------|-----------------------------------------------|------------|--------------|
|             | Raw reads [Mb]           | Trimmed, Paired End reads [Mb] | Percent Loss | Average bp coverage via mapping to J1776 | Number of contigs                                                      | Total size of contigs | Median contig size | N50 contig length | BioSample                                     | SRA        | WGS version  |
|             |                          |                                |              |                                          |                                                                        |                       |                    |                   |                                               |            |              |
| FSL_R8_6848 | 248.6                    | 164.4                          | -34%         | 79.77                                    | 19                                                                     | 3.10E+06              | 31,496             | 5.04E+05          | SAMN02741568                                  | SRR1269984 | JPAH01000000 |
| FSL_R8_6870 | 548.8                    | 193.8                          | -65%         | 93.96                                    | 22                                                                     | 3.13E+06              | 53,770             | 4.84E+05          | SAMN02741569                                  | SRR1269985 | JPAI01000000 |
| FSL_R8_6892 | 379.3                    | 134.4                          | -65%         | 67.06                                    | 34                                                                     | 3.02E+06              | 37,316             | 2.78E+05          | SAMN02741570                                  | SRR1269986 | JPAJ01000000 |
| FSL_R8_6896 | 555.7                    | 190.9                          | -66%         | 93.55                                    | 30                                                                     | 3.11E+06              | 6,962              | 3.45E+05          | SAMN02741571                                  | SRR1269987 | JPAK01000000 |
| FSL_R8_6900 | 428.6                    | 147.9                          | -65%         | 70.59                                    | 43                                                                     | 3.13E+06              | 21,711             | 2.25E+05          | SAMN02741572                                  | SRR1269988 | JPAL01000000 |
| FSL_R8_6908 | 456.0                    | 157.9                          | -65%         | 74.08                                    | 53                                                                     | 3.14E+06              | 3,214              | 2.57E+05          | SAMN02741573                                  | SRR1269989 | JPAM01000000 |
| FSL_R8_6910 | 139.3                    | 93.8                           | -33%         | 45.68                                    | 43                                                                     | 3.10E+06              | 6,375              | 2.55E+05          | SAMN02741574                                  | SRR1269990 | JPAN01000000 |
| FSL_R8_6914 | 138.9                    | 92.3                           | -33%         | 44.51                                    | 51                                                                     | 3.10E+06              | 10,934             | 1.86E+05          | SAMN02741575                                  | SRR1269991 | JPAO01000000 |
| FSL_R8_6918 | 158.5                    | 98.0                           | -38%         | 50.66                                    | 27                                                                     | 2.95E+06              | 97,947             | 1.79E+05          | SAMN02741576                                  | SRR1269895 | JPAP01000000 |
| FSL_R8_6936 | 468.7                    | 168.1                          | -64%         | 80.00                                    | 30                                                                     | 3.13E+06              | 1,778              | 5.08E+05          | SAMN02741577                                  | SRR1269896 | JPAQ01000000 |
| FSL_R8_6963 | 472.0                    | 163.9                          | -65%         | 81.99                                    | 32                                                                     | 3.06E+06              | 35,487             | 2.56E+05          | SAMN02741578                                  | SRR1269897 | JPAR01000000 |
| FSL_R8_6967 | 488.4                    | 181.1                          | -63%         | 87.85                                    | 29                                                                     | 3.11E+06              | 42,036             | 2.73E+05          | SAMN02741579                                  | SRR1269898 | JPAS01000000 |
| FSL_R8_7006 | 157.2                    | 54.4                           | -65%         | 26.97                                    | 49                                                                     | 2.95E+06              | 39,242             | 1.20E+05          | SAMN02741580                                  | SRR1269899 | JPAT01000000 |
| FSL_R8_7020 | 479.2                    | 169.1                          | -65%         | 83.49                                    | 18                                                                     | 3.10E+06              | 17,183             | 5.21E+05          | SAMN02741581                                  | SRR1269900 | JPAU01000000 |
| FSL_R8_7043 | 187.6                    | 133.9                          | -29%         | 69.90                                    | 18                                                                     | 2.89E+06              | 98,002             | 3.09E+05          | SAMN02741582                                  | SRR1269901 | JPAV01000000 |
| FSL_R8_7047 | 48.7                     | 29.9                           | -39%         | 14.78                                    | 101                                                                    | 3.08E+06              | 16,706             | 5.73E+04          | SAMN02741583                                  | SRR1269902 | JPAW01000000 |
| FSL_R8_7057 | 303.0                    | 203.2                          | -33%         | 105.62                                   | 18                                                                     | 2.95E+06              | 97,984             | 4.81E+05          | SAMN02741584                                  | SRR1269903 | JPAX01000000 |
| FSL_R8_7097 | 524.1                    | 177.4                          | -66%         | 80.28                                    | 32                                                                     | 3.11E+06              | 3,579              | 5.15E+05          | SAMN02741585                                  | SRR1269904 | JPAY01000000 |
| FSL_R8_7107 | 534.7                    | 173.9                          | -67%         | 84.37                                    | 48                                                                     | 3.11E+06              | 2,903              | 4.84E+05          | SAMN02741586                                  | SRR1269905 | JPAZ01000000 |
| FSL_R8_7121 | 324.8                    | 119.9                          | -63%         | 56.97                                    | 26                                                                     | 3.12E+06              | 9,206              | 5.08E+05          | SAMN02741587                                  | SRR1269906 | JPBA01000000 |
| FSL_R8_7133 | 460.9                    | 165.2                          | -64%         | 79.28                                    | 25                                                                     | 3.10E+06              | 17,211             | 4.45E+05          | SAMN02741588                                  | SRR1269907 | JPBB01000000 |
| FSL_R8_7149 | 396.1                    | 136.4                          | -66%         | 71.11                                    | 19                                                                     | 2.89E+06              | 8,857              | 3.56E+05          | SAMN02741589                                  | SRR1269908 | JPBC01000000 |
| FSL_R8_7153 | 253.0                    | 185.7                          | -27%         | 91.75                                    | 31                                                                     | 3.06E+06              | 5,756              | 3.03E+05          | SAMN02741590                                  | SRR1269909 | JPBD01000000 |
| FSL_R8_7161 | 215.8                    | 152.3                          | -29%         | 71.90                                    | 25                                                                     | 3.12E+06              | 9,206              | 4.63E+05          | SAMN02741591                                  | SRR1269910 | JPBE01000000 |
| FSL_R8_7198 | 514.0                    | 345.7                          | -33%         | 173.24                                   | 18                                                                     | 3.10E+06              | 17,211             | 5.21E+05          | SAMN02741592                                  | SRR1269911 | JPBF01000000 |
| FSL_R8_7348 | 485.3                    | 169.0                          | -65%         | 82.91                                    | 18                                                                     | 2.95E+06              | 97,984             | 4.81E+05          | SAMN02741593                                  | SRR1269912 | JPBG01000000 |
| FSL_R8_7381 | 297.2                    | 93.8                           | -68%         | 45.78                                    | 33                                                                     | 3.06E+06              | 35,358             | 2.20E+05          | SAMN02741594                                  | SRR1269913 | JPBH01000000 |
| FSL_R8_7389 | 386.1                    | 128.6                          | -67%         | 67.06                                    | 17                                                                     | 2.95E+06              | 34,779             | 4.77E+05          | SAMN02741595                                  | SRR1270023 | JPBI01000000 |
| FSL_R8_7399 | 389.5                    | 134.2                          | -66%         | 69.63                                    | 19                                                                     | 2.89E+06              | 98,001             | 2.89E+05          | SAMN02741596                                  | SRR1270024 | JPBJ01000000 |
| FSL_R8_7427 | 236.8                    | 75.2                           | -68%         | 37.85                                    | 23                                                                     | 3.09E+06              | 16,522             | 3.34E+05          | SAMN02741597                                  | SRR1270025 | JPBK01000000 |
| FSL_R8_7450 | 221.7                    | 161.1                          | -27%         | 82.80                                    | 16                                                                     | 2.95E+06              | 97,984             | 4.81E+05          | SAMN02741598                                  | SRR1270026 | JPBL01000000 |
| FSL_R8_7460 | 195.8                    | 137.4                          | -30%         | 67.02                                    | 22                                                                     | 3.09E+06              | 17,201             | 5.21E+05          | SAMN02741599                                  | SRR1270027 | JPBM01000000 |
| FSL_R8_7474 | 109.0                    | 60.3                           | -45%         | 30.00                                    | 98                                                                     | 3.05E+06              | 8,573              | 6.99E+04          | SAMN02741600                                  | SRR1269862 | JPBN01000000 |
| FSL_R8_7478 | 596.8                    | 222.8                          | -63%         | 105.36                                   | 30                                                                     | 3.06E+06              | 5,756              | 4.78E+05          | SAMN02741601                                  | SRR1269863 | JPBO01000000 |
| FSL_R8_7489 | 463.9                    | 169.8                          | -63%         | 82.47                                    | 20                                                                     | 3.06E+06              | 17,201             | 5.08E+05          | SAMN02741602                                  | SRR1269864 | JPBP01000000 |
| FSL_R8_7493 | 624.7                    | 217.2                          | -65%         | 108.47                                   | 24                                                                     | 3.06E+06              | 21,100             | 5.08E+05          | SAMN02741603                                  | SRR1269865 | JPBQ01000000 |
| FSL_R8_7534 | 630.5                    | 228.9                          | -64%         | 105.63                                   | 20                                                                     | 3.12E+06              | 24,237             | 5.08E+05          | SAMN02741604                                  | SRR1269867 | JPBR01000000 |
| FSL_R8_7554 | 535.4                    | 196.5                          | -63%         | 94.18                                    | 20                                                                     | 3.10E+06              | 17,211             | 5.08E+05          | SAMN02741605                                  | SRR1269868 | JPBS01000000 |
| FSL_R8_7559 | 292.3                    | 204.7                          | -30%         | 99.92                                    | 25                                                                     | 3.10E+06              | 29,821             | 3.32E+05          | SAMN02741606                                  | SRR1269869 | JPBT01000000 |
| FSL_R8_7571 | 129.5                    | 89.8                           | -31%         | 43.32                                    | 38                                                                     | 3.09E+06              | 37,616             | 1.91E+05          | SAMN02741607                                  | SRR1269870 | JPBU01000000 |
| FSL_R8_7585 | 81.5                     | 44.6                           | -45%         | 21.49                                    | 115                                                                    | 3.12E+06              | 14,407             | 6.15E+04          | SAMN02741608                                  | SRR1269871 | JPBV01000000 |
| FSL_R8_7591 | 677.0                    | 241.1                          | -64%         | 114.19                                   | 28                                                                     | 3.11E+06              | 6,375              | 5.16E+05          | SAMN02741609                                  | SRR1269872 | JPBW01000000 |
| FSL_R8_7599 | 502.0                    | 183.4                          | -63%         | 87.77                                    | 34                                                                     | 3.11E+06              | 7,431              | 4.81E+05          | SAMN02741610                                  | SRR1269873 | JPBX01000000 |
| FSL_R8_7603 | 715.4                    | 254.5                          | -64%         | 124.83                                   | 19                                                                     | 3.09E+06              | 5,298              | 5.21E+05          | SAMN02741611                                  | SRR1269874 | JPBY01000000 |
| FSL_R8_7635 | 468.7                    | 172.5                          | -63%         | 80.51                                    | 16                                                                     | 3.10E+06              | 53,770             | 5.22E+05          | SAMN02741612                                  | SRR1269875 | JPBZ01000000 |
| FSL_R8_7676 | 185.8                    | 127.5                          | -31%         | 64.40                                    | 30                                                                     | 3.06E+06              | 35,487             | 2.73E+05          | SAMN02741614                                  | SRR1269877 | JPCA01000000 |
| FSL_R8_7694 | 198.0                    | 147.2                          | -26%         | 70.59                                    | 27                                                                     | 3.10E+06              | 21,100             | 4.77E+05          | SAMN02741615                                  | SRR1269878 | JPCB01000000 |
| FSL_R8_7716 | 116.9                    | 65.0                           | -44%         | 32.33                                    | 58                                                                     | 3.14E+06              | 33,001             | 1.20E+05          | SAMN02741616                                  | SRR1269879 | JPC01000000  |
| FSL_R8_7722 | 282.1                    | 97.6                           | -65%         | 48.09                                    | 29                                                                     | 3.06E+06              | 29,821             | 2.73E+05          | SAMN02741617                                  | SRR1269880 | JPCD01000000 |
| FSL_R8_7761 | 492.5                    | 178.9                          | -64%         | 90.59                                    | 16                                                                     | 2.95E+06              | 97,984             | 4.81E+05          | SAMN02741618                                  | SRR1269881 | JPCE01000000 |
| FSL_R8_7786 | 301.5                    | 102.2                          | -66%         | 50.90                                    | 27                                                                     | 3.09E+06              | 40,340             | 2.68E+05          | SAMN02741619                                  | SRR1269882 | JPCF01000000 |
| FSL_R8_7806 | 385.1                    | 135.1                          | -65%         | 68.93                                    | 23                                                                     | 2.89E+06              | 8,857              | 2.79E+05          | SAMN02741620                                  | SRR1269883 | JPCG01000000 |
| FSL_R8_7812 | 535.6                    | 199.4                          | -63%         | 93.59                                    | 26                                                                     | 3.11E+06              | 8,528              | 5.16E+05          | SAMN02741621                                  | SRR1269884 | JPCH01000000 |
| FSL_R8_7820 | 203.3                    | 141.2                          | -31%         | 67.80                                    | 42                                                                     | 3.14E+06              | 10,341             | 4.90E+05          | SAMN02741622                                  | SRR1269885 | JPCI01000000 |
| FSL_R8_7825 | 281.1                    | 194.8                          | -31%         | 91.26                                    | 39                                                                     | 3.14E+06              | 6,847              | 5.16E+05          | SAMN02741623                                  | SRR1269886 | JPCJ01000000 |
| FSL_R8_7829 | 78.4                     | 40.9                           | -48%         | 19.44                                    | 143                                                                    | 3.08E+06              | 10,162             | 4.71E+04          | SAMN02741624                                  | SRR1269887 | JPCK01000000 |
| FSL_R8_7833 | 371.7                    | 127.6                          | -66%         | 62.08                                    | 33                                                                     | 3.13E+06              | 51,934             | 2.20E+05          | SAMN02741625                                  | SRR1269888 | JPCL01000000 |

| FSL         | Sequence Read File Sizes |                                |              | Reference Mapping                        | De Novo Assembled, Filtered Contigs [>1X k-mer coverage, >500 bp] |                       |                    |                   | GenBank Accessions for BioProject PRJNA245909 |            |              |
|-------------|--------------------------|--------------------------------|--------------|------------------------------------------|-------------------------------------------------------------------|-----------------------|--------------------|-------------------|-----------------------------------------------|------------|--------------|
|             | Raw reads [Mb]           | Trimmed, Paired End reads [Mb] | Percent Loss | Average bp coverage via mapping to J1776 | Number of contigs                                                 | Total size of contigs | Median contig size | N50 contig length | BioSample                                     | SRA        | WGS version  |
| FSL_R8_7842 | 653.1                    | 214.3                          | -67%         | 105.35                                   | 33                                                                | 3.10E+06              | 8,528              | 3.05E+05          | SAMN02741626                                  | SRR1269889 | JPCM01000000 |
| FSL_R8_7846 | 484.9                    | 159.8                          | -67%         | 81.32                                    | 33                                                                | 3.10E+06              | 6,494              | 2.92E+05          | SAMN02741627                                  | SRR1269890 | JPCN01000000 |
| FSL_R8_7860 | 570.7                    | 204.5                          | -64%         | 97.95                                    | 20                                                                | 3.13E+06              | 72,580             | 4.84E+05          | SAMN02741628                                  | SRR1269891 | JPCO01000000 |
| FSL_R8_7866 | 540.5                    | 159.2                          | -71%         | 76.53                                    | 22                                                                | 3.13E+06              | 53,770             | 4.20E+05          | SAMN02741629                                  | SRR1269892 | JPCP01000000 |
| FSL_R8_7870 | 306.0                    | 168.9                          | -45%         | 82.60                                    | 23                                                                | 3.10E+06              | 32,625             | 4.43E+05          | SAMN02741630                                  | SRR1269893 | JPDF01000000 |
| FSL_R8_7881 | 205.8                    | 86.0                           | -58%         | 43.00                                    | 49                                                                | 3.12E+06              | 33,756             | 1.34E+05          | SAMN02741631                                  | SRR1269894 | JPDE01000000 |
| FSL_R8_7902 | 113.0                    | 66.6                           | -41%         | 33.63                                    | 95                                                                | 3.05E+06              | 18,443             | 6.07E+04          | SAMN02741632                                  | SRR1269457 | JPDD01000000 |
| FSL_R8_7914 | 675.3                    | 243.6                          | -64%         | 125.88                                   | 14                                                                | 2.89E+06              | 156,963            | 3.56E+05          | SAMN02741633                                  | SRR1269848 | JPDC01000000 |
| FSL_R8_7926 | 503.7                    | 184.9                          | -63%         | 89.52                                    | 21                                                                | 3.07E+06              | 29,471             | 4.98E+05          | SAMN02741634                                  | SRR1269850 | JPDB01000000 |
| FSL_R8_8446 | 675.8                    | 235.1                          | -65%         | 117.35                                   | 22                                                                | 3.10E+06              | 16,522             | 3.35E+05          | SAMN02741635                                  | SRR1269851 | JPDA01000000 |
| FSL_R8_8476 | 579.3                    | 213.2                          | -63%         | 97.54                                    | 27                                                                | 3.11E+06              | 8,528              | 4.80E+05          | SAMN02741636                                  | SRR1269852 | JPCZ01000000 |
| FSL_R8_8511 | 319.0                    | 144.1                          | -55%         | 71.78                                    | 29                                                                | 3.10E+06              | 8,724              | 2.97E+05          | SAMN02741637                                  | SRR1269853 | JPCY01000000 |
| FSL_R8_8816 | 168.6                    | 112.7                          | -33%         | 55.22                                    | 27                                                                | 3.12E+06              | 21,038             | 4.49E+05          | SAMN02741638                                  | SRR1269854 | JPCX01000000 |
| FSL_R8_9398 | 76.2                     | 48.2                           | -37%         | 23.65                                    | 67                                                                | 3.08E+06              | 27,853             | 9.15E+04          | SAMN02741639                                  | SRR1269855 | JPCW01000000 |
| FSL_R8_9399 | 149.4                    | 102.7                          | -31%         | 49.74                                    | 41                                                                | 3.03E+06              | 41,524             | 2.03E+05          | SAMN02741640                                  | SRR1269856 | JPCV01000000 |
| FSL_R8_9402 | 1035.4                   | 370.6                          | -64%         | 183.16                                   | 19                                                                | 3.09E+06              | 5,298              | 5.21E+05          | SAMN02741641                                  | SRR1269857 | JPCU01000000 |
| FSL_T1_0023 | 115.1                    | 78.8                           | -32%         | 38.60                                    | 36                                                                | 3.06E+06              | 28,389             | 1.92E+05          | SAMN02741642                                  | SRR1269858 | JPCT01000000 |
| FSL_T1_0946 | 168.6                    | 106.1                          | -37%         | 52.17                                    | 53                                                                | 3.06E+06              | 21,197             | 1.60E+05          | SAMN02741643                                  | SRR1269859 | JPCS01000000 |
| FSL_V1_0009 | 587.8                    | 210.2                          | -64%         | 105.73                                   | 16                                                                | 2.99E+06              | 49,055             | 5.14E+05          | SAMN02741644                                  | SRR1269860 | JPCR01000000 |
| FSL_V1_0117 | 44.9                     | 16.8                           | -63%         | 7.97                                     | 456                                                               | 2.90E+06              | 3,809              | 1.14E+04          | SAMN02741645                                  | SRR1269861 | JPCQ01000000 |
| FSL_R8_5528 | 661.2                    | 326.7                          | -51%         | not calculated                           | 18                                                                | 3.10E+06              | 19,875             | 5.15E+05          | SAMN02741486                                  | SRR1269934 | JPIW01000000 |
| FSL_R8_7653 | 235.4                    | 100.4                          | -57%         | not calculated                           | 30                                                                | 3.06E+06              | 32,318             | 2.55E+05          | SAMN02741613                                  | SRR1269876 | JPIV01000000 |

FSL R8-5528 and FSL R8-7653 initial coverage was too low for de-novo assembly. Reported values are from MiSeq re-sequencing.

Average coverage was calculated by mapping sequence reads to J1776 reference genome using BWA-MEM and parsing results files.

**TABLE S3.** Additional genomes used in the kSNP analysis.

| <b>Strain</b> | <b>NCBI Assembly</b> | <b>Comment</b>                                   |
|---------------|----------------------|--------------------------------------------------|
| J1776         | GCA_000438705.2      | reference strain for lineage I isolate analysis  |
| 1/2a F6854    | GCA_000167135.1      |                                                  |
| J2818         | GCA_000168655.1      |                                                  |
| F6900         | GCA_000168615.1      |                                                  |
| J0161         | GCA_000168635.2      |                                                  |
| FSL N3-165    | GCA_000168535.1      |                                                  |
| FSL J2-003    | GCA_000168455.1      |                                                  |
| 10403S        | GCA_000168695.2      |                                                  |
| SLCC5850      | GCA_000307045.1      |                                                  |
| EGD           | GCA_000582845.1      |                                                  |
| Finland 1988  | GCA_000168595.2      |                                                  |
| SLCC7179      | GCA_000306985.1      |                                                  |
| 08-5578       | GCA_000093125.2      |                                                  |
| 08-5923       | GCA_000022925.1      |                                                  |
| EGD-e         | GCA_000196035.1      | reference strain for lineage II isolate analysis |
| SLCC2372      | GCA_000210815.2      |                                                  |
| FSL R2-561    | GCA_000168575.2      |                                                  |
| SLCC2479      | GCA_000307005.1      |                                                  |
| LO28          | GCA_000168675.1      |                                                  |
| N53-1         | GCA_000382945.1      |                                                  |
| La111         | GCA_000382925.1      |                                                  |
| SLCC2376      | GCA_000250715.1      |                                                  |
| SLCC2376      | GCA_000250715.1      |                                                  |
| FSL J2-071    | GCA_000168475.1      |                                                  |
| HCC23         | GCA_000021185.1      |                                                  |
| L99           | GCA_000209755.1      |                                                  |
| M7            | GCA_000218305.1      |                                                  |
| SLCC2540      | GCA_000306905.1      |                                                  |
| SLCC2482      | GCA_000210795.2      |                                                  |
| FSL N1-017    | GCA_000168515.1      |                                                  |
| SLCC2755      | GCA_000197755.2      |                                                  |
| FSL J1-175    | GCA_000168415.1      |                                                  |
| FSL J1-194    | GCA_000168395.1      |                                                  |
| 07PF0776      | GCA_000258905.1      |                                                  |
| Clip80459     | GCA_000026705.1      |                                                  |
| L312          | GCA_000307085.1      |                                                  |
| 4b F2365      | GCA_000008285.1      |                                                  |
| LL195         | GCA_000318055.1      |                                                  |
| SLCC2378      | GCA_000307615.1      |                                                  |
| 4b H7858      | GCA_000167155.1      |                                                  |
| ATCC 19117    | GCA_000307025.1      |                                                  |
| Scott A       | GCA_000212455.1      |                                                  |
| HPB2262       | GCA_000168815.1      |                                                  |
| J2-064        | GCA_000438625.1      |                                                  |



**TABLE S4.** Gene presence/absence enrichment analysis for selected groups of isolates.

| Subtype or other information defining groups tested for gene enrichment |                                                 | Number of genes significantly enriched <sup>a</sup> in |                 | Putative explanatory mobile element (size) |
|-------------------------------------------------------------------------|-------------------------------------------------|--------------------------------------------------------|-----------------|--------------------------------------------|
| Group 1 (n isolates)                                                    | Group 2 (n isolates)                            | Group 1                                                | Group 2         |                                            |
| CU-8-96 (n=12)                                                          | CU-11-320 (n=19)                                | 29                                                     | 0               | Prophage (21.2 kb) <sup>b</sup>            |
| CU-258-322 (n=4)                                                        | CU-258-323 (n=4)                                | 32 <sup>c</sup>                                        | 0               | Prophage (45.7 kb) <sup>b</sup>            |
| CU-262-319 (n=3)                                                        | CU-262-79 (n=12)                                | 69                                                     | 0               | Prophage (47.5 kb) <sup>b</sup>            |
| Initially Persistent (n=92)                                             | Sporadic (n=29)                                 | 0                                                      | 0               | na <sup>d</sup>                            |
| Statistically Persistent (n=38) <sup>e</sup>                            | Sporadic of same PFGE types (n=16) <sup>e</sup> | 0                                                      | 0               | na                                         |
| SNP gr. 1, Deli 2 (n=7)                                                 | SNP gr. 1, not Deli 2 (n=36)                    | 0                                                      | 0               | na                                         |
| SNP gr. 1, Deli 16 (n=4)                                                | SNP gr. 1, not Deli 16 (n=39)                   | 0                                                      | 10 <sup>f</sup> | na                                         |
| SNP gr. 1, Deli 10 (n=4)                                                | SNP gr. 1, not Deli 10 (n=39)                   | 0                                                      | 0               | na                                         |
| SNP gr. 1, Deli 18 (n=3)                                                | SNP gr. 1, not Deli 24 (n=40)                   | 0                                                      | 0               | na                                         |
| SNP gr. 1, Deli 21 (n=3)                                                | SNP gr. 1, not Deli 21 (n=40)                   | 0                                                      | 0               | na                                         |
| SNP gr. 1, Deli 24 (n=5)                                                | SNP gr. 1, not Deli 24 (n=38)                   | 0                                                      | 0               | na                                         |
| CU-258-69, Deli 7 (n=3)                                                 | CU-258-69, not Deli 7 (n=8)                     | 0                                                      | 0               | na                                         |
| SNP gr. 3, Deli 28 (n=6)                                                | SNP gr. 3, not Deli 28 (n=9)                    | 0                                                      | 0               | na                                         |
| SNP gr. 3, Deli 2 (n=3)                                                 | SNP gr. 3, not Deli 2 (n=12)                    | 0                                                      | 0               | na                                         |

<sup>a</sup> False discovery rate (FDR) corrected p-value from Fisher's Exact test < 0.05.

<sup>b</sup> Some significantly enriched genes were phage related, consistent with an intact prophage encoded in the genomes of group 1 isolates but absent in group 2 isolates.

<sup>c</sup> Each of the 32 genes had an FDR adjusted p-value = 0.051 and were present in all CU-258-322 isolates but absent in all CU-258-323 isolates. With only 4 isolates in each group, the test power was insufficient to pass FDR correction.

<sup>d</sup> na, not applicable.

<sup>e</sup> 'statistically persistent' includes all putatively persistent isolates with statistically fewer median SNP count differences than comparison isolates (Table 4). 'Sporadic' includes all available sporadic isolates of a subtype represented among statistically persistent isolates. Subsequent rows present the groups subset by subtype and deli of isolation.

<sup>f</sup> Details on these 10 genes in Table S7.

**TABLE S5.** Phylogenetic model selection by path sampling.

| Model <sup>a</sup>                                        | Likelihood (L) and Bayes Factor (BF) support for the choice of row model over column model |                    |                    |                    |
|-----------------------------------------------------------|--------------------------------------------------------------------------------------------|--------------------|--------------------|--------------------|
|                                                           | CS                                                                                         | SS                 | CR                 | SR                 |
| <i>For 179 lineage I isolates</i>                         |                                                                                            |                    |                    |                    |
| Coalescent population, Strict clock (CS)                  | $L_{CS} = -62141$                                                                          | -                  | -                  | -                  |
| Bayesian Skyline population, Strict clock (SS)            | 85 <sup>b</sup>                                                                            | $L_{SS} = -62056$  | -                  | -                  |
| Coalescent population, lognormal Relaxed clock (CR)       | 141                                                                                        | 56                 | $L_{CR} = -62001$  | -                  |
| Bayesian Skyline population, lognormal Relaxed clock (SR) | 157                                                                                        | 72                 | 16                 | $L_{SR} = -61985$  |
| <i>For 9 lineage II isolates</i>                          |                                                                                            |                    |                    |                    |
| Coalescent population, Strict clock (CS)                  | $L_{CS} = -8929.3$                                                                         | -                  | -                  | -                  |
| Bayesian Skyline population, Strict clock (SS)            | 1.7                                                                                        | $L_{SS} = -8927.7$ | -                  | -                  |
| Coalescent population, lognormal Relaxed clock (CR)       | -2.4                                                                                       | -4.1               | $L_{CR} = -8931.8$ | -                  |
| Bayesian Skyline population, lognormal Relaxed clock (SR) | 1.1                                                                                        | -0.6               | 3.5                | $L_{SR} = -8928.2$ |

<sup>a</sup> Models varied based on their tree prior (constant coalescent or Bayesian Skyline) and clock (strict or lognormal relaxed) specifications. Models were otherwise identical in specification of the GTR model of site substitution and input SNP data. For the lineage I models, strict clock models were sampled using 10 path steps of 5 million generations and relaxed clock models sampled using 10 steps of 10 million generations. For the lineage II models, all were sampled using 10 path steps of 10 million generations.

<sup>b</sup> BF calculated as  $L_{SS} - L_{CS}$  and similarly for all the off-diagonals.

**TABLE S6.** Presence or absence of previously described *L. monocytogenes* plasmids among sequenced isolates.

| Isolate<br>PFGE type | Number of isolates of a PFGE type with >70% of the sequence of a plasmid (GenBank accession, reference) absent (-) or present (+). |   |                                      |   |                             |   |                               |   |                                                  |   |                                |   |                               |   |                       |    |
|----------------------|------------------------------------------------------------------------------------------------------------------------------------|---|--------------------------------------|---|-----------------------------|---|-------------------------------|---|--------------------------------------------------|---|--------------------------------|---|-------------------------------|---|-----------------------|----|
|                      | pLM1-<br>2bUG1<br>(FR667692,<br>(1))                                                                                               |   | pLM1-<br>2cUG1<br>(FR667691,<br>(1)) |   | pLM33<br>(GU244485,<br>(1)) |   | pLM7UG1<br>(FR667690,<br>(1)) |   | pLM80<br>(AADR01000010,<br>AADR01000058,<br>(1)) |   | pLMIV<br>(NZ_CM001470,<br>(2)) |   | pLM5578<br>(CP001603,<br>(1)) |   | pJ1776<br>(NC_022046) |    |
|                      | -                                                                                                                                  | + | -                                    | + | -                           | + | -                             | + | -                                                | + | -                              | + | -                             | + | -                     | +  |
| CU-8-340             | 0                                                                                                                                  | 5 | 0                                    | 5 | 0                           | 5 | 0                             | 5 | 5                                                | 0 | 5                              | 0 | 5                             | 0 | 5                     | 0  |
| CU-40-96             | 12                                                                                                                                 | 0 | 12                                   | 0 | 12                          | 0 | 12                            | 0 | 12                                               | 0 | 12                             | 0 | 12                            | 0 | 12                    | 0  |
| CU-8-96              | 20                                                                                                                                 | 0 | 20                                   | 0 | 20                          | 0 | 20                            | 0 | 20                                               | 0 | 20                             | 0 | 20                            | 0 | 20                    | 0  |
| CU-11-320            | 36                                                                                                                                 | 0 | 36                                   | 0 | 36                          | 0 | 36                            | 0 | 36                                               | 0 | 36                             | 0 | 36                            | 0 | 36                    | 0  |
| CU-259-322           | 5                                                                                                                                  | 0 | 5                                    | 0 | 5                           | 0 | 5                             | 0 | 0                                                | 5 | 5                              | 0 | 5                             | 0 | 0                     | 5  |
| CU-258-322           | 7                                                                                                                                  | 0 | 7                                    | 0 | 7                           | 0 | 7                             | 0 | 0                                                | 7 | 7                              | 0 | 7                             | 0 | 0                     | 7  |
| CU-258-323           | 8                                                                                                                                  | 0 | 8                                    | 0 | 8                           | 0 | 8                             | 0 | 0                                                | 8 | 8                              | 0 | 8                             | 0 | 0                     | 8  |
| CU-258-69            | 18                                                                                                                                 | 0 | 18                                   | 0 | 18                          | 0 | 18                            | 0 | 16                                               | 2 | 18                             | 0 | 18                            | 0 | 1                     | 17 |
| CU-262-318           | 4                                                                                                                                  | 0 | 4                                    | 0 | 4                           | 0 | 4                             | 0 | 1                                                | 3 | 4                              | 0 | 4                             | 0 | 4                     | 0  |
| CU-262-334           | 2                                                                                                                                  | 0 | 2                                    | 0 | 2                           | 0 | 2                             | 0 | 2                                                | 0 | 2                              | 0 | 2                             | 0 | 2                     | 0  |
| CU-262-319           | 6                                                                                                                                  | 0 | 6                                    | 0 | 6                           | 0 | 6                             | 0 | 6                                                | 0 | 6                              | 0 | 6                             | 0 | 6                     | 0  |
| CU-262-79            | 21                                                                                                                                 | 0 | 21                                   | 0 | 21                          | 0 | 21                            | 0 | 21                                               | 0 | 21                             | 0 | 21                            | 0 | 21                    | 0  |
| CU-11-282            | 5                                                                                                                                  | 0 | 5                                    | 0 | 5                           | 0 | 5                             | 0 | 5                                                | 0 | 5                              | 0 | 5                             | 0 | 5                     | 0  |
| CU-11-326            | 3                                                                                                                                  | 0 | 3                                    | 0 | 3                           | 0 | 3                             | 0 | 0                                                | 3 | 3                              | 0 | 3                             | 0 | 3                     | 0  |
| CU-294-321           | 11                                                                                                                                 | 0 | 11                                   | 0 | 11                          | 0 | 11                            | 0 | 11                                               | 0 | 11                             | 0 | 11                            | 0 | 11                    | 0  |
| CU-55-266            | 4                                                                                                                                  | 0 | 4                                    | 0 | 4                           | 0 | 4                             | 0 | 0                                                | 4 | 4                              | 0 | 4                             | 0 | 4                     | 0  |
| CU-57-267            | 12                                                                                                                                 | 0 | 12                                   | 0 | 12                          | 0 | 12                            | 0 | 12                                               | 0 | 12                             | 0 | 12                            | 0 | 12                    | 0  |

**References for Table S6**

1. **Kuene C, Voget S, Pischmarov J, Oehm S, Goesmann A, Daniel R, Hain T, Chakraborty T.** 2010. Comparative analysis of plasmids in the genus *Listeria*. *PLoS ONE* **5**.
2. **den Bakker HC, Bowen BM, Rodriguez-Rivera LD, Wiedmann M.** 2012. FSL J1-208, a virulent uncommon phylogenetic lineage IV *Listeria monocytogenes* strain with a small chromosome size and a putative virulence plasmid carrying internalin-like genes. *Appl Environ Microbiol* **78**:1876-1889.



**Table S7. Genes significantly enriched in the 38 strains in SNP group 1 not from Store 16.**

| ITEP gene cluster ID | adjusted P-value | Count of isolates of SNP group 1 with the given gene |              |                        |              | Gene information                      | Predicted gene position in |                       |                     |                        |         |      |         |         |      |
|----------------------|------------------|------------------------------------------------------|--------------|------------------------|--------------|---------------------------------------|----------------------------|-----------------------|---------------------|------------------------|---------|------|---------|---------|------|
|                      |                  | absent among isolates                                |              | present among isoaltes |              |                                       | FSL_R8_7554 Contig0001 b   |                       |                     | FSL_R8_6780 Contig0001 |         |      |         |         |      |
|                      |                  | not from deli 16                                     | from deli 16 | not from deli 16       | from deli 16 |                                       | Annotation                 | Length                | Nucleotide Sequence | Protein Sequence       | Start   | Stop | Strand  | Start   | Stop |
| 2464                 | 0.043            | 1                                                    | 3            | 38                     | 1            | a transcriptional regulator           | 716                        | ATGAGTGAA(MSEQVRVLV   | MSEQVRVLV           | 176,563                | 175,847 | -    | 77,746  | 78,462  | +    |
| 2465                 | 0.043            | 1                                                    | 3            | 38                     | 1            | multidrug transporter cfla            | 1190                       | ATGGAAAAA(MEKNIETKKI  | MEKNIETKKI          | 315,203                | 314,013 | -    | 315,226 | 314,036 | -    |
| 2466                 | 0.043            | 1                                                    | 3            | 38                     | 1            | aminobenzoate synthetase              | 1706                       | ATGAGCTTATMSLLRFDFEC  | MSLLRFDFEC          | 351,977                | 350,271 | -    | 352,000 | 350,294 | -    |
| 2468                 | 0.043            | 1                                                    | 3            | 38                     | 1            | peptidoglycan-binding protein         | 1004                       | GTGAGTAAA(MSKNVKKIVI  | MSKNVKKIVI          | 307,810                | 308,814 | +    | 388,088 | 387,084 | -    |
| 2470                 | 0.043            | 1                                                    | 3            | 38                     | 1            | sugar transporter                     | 1916                       | GTGAGTGCTTMSASKLSLPR  | MSASKLSLPR          | 305,505                | 307,421 | +    | 305,528 | 307,444 | +    |
| 2471                 | 0.043            | 1                                                    | 3            | 38                     | 1            | pts fructose transporter subunit iia  | 1898                       | ATGGATACTC(MDTQKEILA) | MDTQKEILA)          | 396,822                | 398,720 | +    | 299,076 | 297,178 | -    |
| 2472                 | 0.043            | 1                                                    | 3            | 38                     | 1            | gntr family transcriptional regulator | 377                        | ATGAAGTTTG(MKFDDSKPI) | MKFDDSKPI)          | 215,875                | 216,252 | +    | 480,023 | 479,646 | -    |
| 2474                 | 0.043            | 1                                                    | 3            | 38                     | 1            | dna glycosylase                       | 1088                       | ATGAAGAGA(MKRLTWDEI   | MKRLTWDEI           | 7,058                  | 5,970   | -    | 145,798 | 146,886 | +    |
| 2476                 | 0.043            | 1                                                    | 3            | 38                     | 1            | membrane protein                      | 1475                       | ATGATAGGG(MIGKVKSISV  | MIGKVKSISV          | 6,308                  | 7,783   | +    | 57,372  | 58,847  | +    |
| 2477                 | 0.043            | 1                                                    | 3            | 38                     | 1            | histidine kinase                      | 728                        | ATGCTACCGC(MLPVFICEDN | MLPVFICEDN          | 178,721                | 177,993 | -    | 178,744 | 178,016 | -    |

a The single isolate of SNP group 1 from Deli 16 that had these 10 genes present was FSL\_R8\_6780. This isolate was not found in Clade R with the other 3 isolates from Store 16, but rather mixed within other isoaltes of SNP group 1 from other delis. This suggests the possibility of separate sub-populations of the same SNP group 1 subtype within deli 16, which have separate genes presence/absence patterns.

b These contigs IDs are those submitted to GenBank in the WGS archive. Isolate FSL R8\_7554 is a SNP group 1 isolate not from deli 16 and isolate R8\_6780 an isolate from deli 16 not present clade R
